# Supplementary material for: Identification of a bilirubin receptor that may mediate a component of cholestatic itch
Source: eLife. 2019 Jan 21;8:e44116. doi: 10.7554/eLife.44116 (PMC6368403; doi:10.7554/eLife.44116)
Supplement: Figure 3—source data 1. [file elife-44116-fig3-data1.xlsx]

## Sheet: Fig 3 - F
DIAMETERS
11.7619
20.8
14.3
15.6
36.4
16.64
10.4
15.6
20.8
18.2
22.1
27.3
13
10.4
10.4
20.8
18.2
23.4
11.5019
19.5
13.52
22.1
15.6
23.4
11.7619
19.5
39
24.7
21.32
28.6
14.3
23.4
22.1
26
23.4
29.9
31.2
26
20.8
19.5
32.5
23.4
22.1
24.7
15.6
20.8
13
11.7619
13
18.2
26
31.2
26
29.9
20.8
26
15.6
18.2
15.6
14.3
11.7619
19.5
23.4
13
17.68
11.7619
18.2
18.2
15.6
25.22
24.7
16.9
23.4
20.8
26
14.3
28.6
23.4
26
33.8
16.9
26
13
19.5
18.2
15.6
26
11.7619
26
16.9
23.4

## Sheet: Fig 3 - G
t
0.644		1	1	1	1	1.00187	1.00364	1.00333	1	1.00029	1.00018	1	1.00013	1	0.999937	0.999718	1	1	1	1	1	1.00609	0.999986
2.284		1.00283	0.992999	0.994431	0.986928	1.02523	1.04909	1.055	1.02559	1.00064	1.00415	1.00286	1.00466	1.00221	0.999122	0.99993	1.00051	1.00081	0.997201	0.996828	1.00227	1.01236	1.00451
3.926		1.00283	0.995332	0.984089	0.985994	0.995327	1.03455	1.09417	1	0.980452	1.00369	0.999679	1.00086	0.992921	0.993538	0.998099	1.00163	1.00029	0.997201	0.996077	0.999933	1.00877	1.00072
5.609		1.01414	1.0105	0.953858	0.990663	0.969159	1.05455	1.02833	1.00948	0.981787	0.999324	0.992608	0.994739	0.996613	1.00075	0.999859	1.00261	1.00037	0.999689	1.0005	1.0032	1.01206	0.994596
7.256		0.981612	0.984831	0.945107	1.20915	1.02804	1.09364	1.11833	1.02844	0.976682	1.0012	1.00003	0.995645	0.998476	0.996675	0.996831	1.00098	0.99684	0.999456	1.00033	1.0046	1.01243	0.995502
8.901		1.02546	1.01984	0.949881	1.0831	1	1.02909	1.18917	1.01232	0.973956	0.993178	0.992812	0.991591	0.995619	1.00546	0.997887	1.00244	1.00066	0.998212	1	1.004	1.01718	0.991449
10.588		1.02405	1.02334	0.97136	1.04388	1.03084	1.14	1.19417	1.01706	0.967865	0.99665	0.995267	0.996766	0.991961	1.00659	0.997254	0.999401	0.998456	1.00023	1.001	1.00407	1.01943	0.996623
12.274		0.995757	0.991832	0.966587	1.02801	1.04673	1.15818	1.16833	1.01801	0.966183	0.99834	0.994069	1.00052	0.997968	1.01286	0.998591	1.00663	0.999706	0.998289	1.00175	1.00627	1.05171	1.00037
13.915		1.02829	1.0315	0.927605	1.0056	1.0271	1.09364	1.2025	1.01232	0.967807	1.00169	1.00123	1.00513	0.995518	1.01982	1.00169	1.01057	1.00176	0.993002	0.994491	1.0046	1.02382	1.00499
15.571		1	1.0035	0.965792	1.01587	1.03832	1.11636	1.1725	1.02559	0.971172	0.986171	0.986502	0.99047	0.995608	1.02855	0.998451	1.0012	1.00882	0.992069	0.991068	1.004	1.0198	0.990328
17.245		1.00849	1	0.958632	1.01307	1.04019	1.09091	1.1625	1.03507	0.966415	0.993915	1.00137	1.00216	0.996387	1.07171	1.00056	0.986482	0.998016	0.98616	0.98798	1.00407	1.01377	1.00201
18.881		1.00141	0.996499	0.932379	1.0112	1.04206	1.10273	1.11917	1.02559	0.965429	0.991364	0.989803	0.998965	0.99213	1.05	0.986338	0.973435	0.982067	1.28621	0.989399	1.004	1.00938	0.998822
20.518		1.02122	1.0175	0.972951	0.99253	1.00841	1.07727	1.16	1.01517	1.12941	0.989859	0.991059	0.996033	0.97498	1.04598	0.987817	0.980194	0.988314	1.48604	0.99783	1.00407	1.00828	0.99589
22.188		0.985856	1.26838	0.953063	1.45191	1.04392	1.04818	1.1125	1.00758	1.65458	1.09856	0.986326	0.994825	0.963802	1.26882	0.990282	0.975959	0.99412	1.432	1.00601	1.73349	1.00493	0.994682
23.842		1.05233	1.63944	1.50358	2.32586	1.04392	1.08455	1.095	1.03602	1.72042	1.6323	0.983492	1.16106	1.19515	1.43946	0.997042	0.977499	1.00331	1.38963	1.62028	2.0489	1.00299	0.993691
25.487		1.47666	1.61027	1.61098	1.99533	1.08318	1.12727	1.11417	1.0019	1.73533	2.5229	0.989599	1.47292	1.45548	1.63049	1.00092	1.33644	1.28649	1.35961	1.66578	2.0026	1.96491	0.997183
27.123		1.61386	1.51692	1.69451	2.3436	1.07009	1.34091	1.17167	1.02085	1.71276	2.85452	0.987437	1.50798	1.74175	1.78871	1.00225	1.61466	1.35462	1.47866	1.67362	1.92789	2.26613	0.997011
28.777		1.63649	1.47375	1.64121	2.2633	1.14953	1.78909	1.27417	1.03886	1.65081	2.93393	0.982353	1.41242	2.02789	1.99228	1.00232	1.57167	1.45994	1.43286	1.64533	1.87065	2.18054	1.16089
30.453		1.61952	1.42357	1.69531	2.17367	1.54299	2.18091	1.5025	1.14881	1.63927	2.94133	0.985888	1.3693	2.20866	2.1643	1.01042	1.55272	1.45627	1.38076	1.60877	1.83709	1.96589	1.47271
32.096		1.58982	1.37456	1.68337	2.02988	1.75888	2.17818	1.60083	1.56872	1.60713	2.92259	2.04245	1.33575	2.27487	2.27127	1.01465	1.52034	1.55137	1.33784	1.57362	1.81201	1.76195	1.50776
33.75		1.52758	1.32089	1.71917	1.96919	1.76822	2.14818	1.6525	1.73175	1.5873	2.96792	2.09472	1.31013	2.23126	2.38256	1.02718	1.48787	1.51808	1.32851	1.57045	1.77885	1.61576	1.41222
35.437		1.47242	1.26954	1.73429	2.22969	1.72523	2.13273	1.7075	1.68152	1.55006	2.93257	2.0322	1.2925	2.18945	2.46512	1.03803	1.45087	1.53454	1.30736	1.55	1.75097	1.49181	1.3691
37.142		1.40594	1.22287	1.76372	2.01401	1.66168	2.09545	1.66083	1.67393	1.54478	2.93273	2.00216	1.26084	2.11843	2.5155	1.1638	1.42144	1.5405	1.28365	1.54182	1.71895	1.39855	1.33556
38.825		1.32673	1.15986	1.62212	1.90943	1.71682	1.97454	1.57917	1.68341	1.53834	2.90922	1.94244	1.24153	2.02321	2.50332	1.15986	1.38636	1.56967	1.26538	1.52888	1.69233	1.33167	1.30994
40.497		1.28289	1.10969	1.65473	1.77871	1.70748	2.30909	1.71667	1.71564	1.5344	2.92735	1.91384	1.22191	1.9383	2.57635	1.41169	1.36001	1.52859	1.24951	1.51828	1.66738	1.26546	1.29231
42.143		1.22914	1.14702	1.60064	1.63679	1.71682	1.79182	1.6525	1.65118	1.54774	2.89628	1.85622	1.21673	1.85095	2.57848	1.50408	1.34217	1.51904	1.23202	1.51277	1.63022	1.22398	1.26066
43.828		1.21216	1.09	1.47812	1.55462	1.76075	1.60273	1.69583	1.65782	1.53382	2.93546	1.81949	1.20565	1.77889	2.56957	1.60944	1.32489	1.53013	1.21274	1.50075	1.5998	1.18725	1.24135
45.473		1.21358	1.01	1.45187	1.47806	1.64112	1.47454	1.57417	1.63507	1.52013	2.89782	1.76933	1.19413	1.70481	2.53733	1.68282	1.30406	1.54035	1.20473	1.48456	1.56324	1.15502	1.22173
47.161		1.1585	0.992999	1.41368	1.38375	1.60841	1.35909	1.50833	1.57536	1.4989	2.87096	1.75101	1.17602	1.63873	2.52999	1.74613	1.28862	1.55865	1.18887	1.46336	1.53209	1.12804	1.21656
48.802		1.0476	0.995332	1.27049	1.32119	1.58505	1.32	1.49667	1.58104	1.46276	2.85433	1.71478	1.1671	1.57277	2.49442	1.75944	1.27352	1.55865	1.1737	1.47771	1.4944	1.11232	1.20548
50.487		1.0243	1.0105	1.17184	1.26704	1.55047	1.31546	1.465	1.52322	1.429	2.74499	1.69421	1.16029	1.51348	2.48645	1.7738	1.26162	1.55784	1.17596	1.47579	1.45237	1.10136	1.19396
52.144		1.015	0.984831	1.17104	1.22689	1.49626	1.24364	1.45167	1.50711	1.39635	2.6555	1.65231	1.14213	1.46362	2.46317	1.7681	1.25683	1.55777	1.17658	1.46745	1.41528	1.08217	1.17586
53.822		0.981612	1.01984	1.12092	1.21288	1.41869	1.18818	1.4625	1.48152	1.36125	2.6145	1.62891	1.1323	1.42859	2.41606	1.75817	1.23553	1.58665	1.16912	1.46369	1.37805	1.06944	1.16693
55.505		1.00424	1.02334	1.12092	1.21662	1.37664	1.17909	1.35917	1.51754	1.333	2.5299	1.6323	1.13786	1.39661	2.37503	1.74521	1.22295	1.54226	1.16212	1.46043	1.34837	1.05013	1.16012
57.158		1.00566	0.991832	1.13126	1.18207	1.35888	1.14182	1.24417	1.44834	1.30957	2.46875	1.59236	1.12432	1.37711	2.31769	1.75141	1.21701	1.53991	1.16352	1.45184	1.31981	1.04361	1.14197
58.841		1.00424	0.992999	1.09865	1.15686	1.33832	1.12182	1.285	1.39336	1.28962	2.40771	1.557	1.11811	1.36538	2.27371	1.74289	1.20345	1.53668	1.15597	1.44399	1.2962	1.03691	1.13214
60.48		1.00566	0.995332	1.03898	1.15126	1.29626	1.16273	1.2975	1.31754	1.27929	2.31534	1.55651	1.11509	1.19515	2.2655	1.73683	1.19647	1.53263	1.14478	1.43339	1.28686	1.031	1.1377
62.116		1	1.0105	1.05728	1.14939	1.30467	1.09636	1.34167	1.27583	1.25006	2.25243	1.52726	1.10729	1.1433	2.20295	1.74289	1.18689	1.52543	1.12791	1.42354	1.26664	0.999391	1.12416
63.763		1.02546	0.984831	1.05648	1.11298	1.29346	1.09091	1.35583	1.26446	1.24582	2.18092	1.51151	1.10017	1.14917	2.12861	1.72697	1.17637	1.51573	1.13063	1.41911	1.25097	0.997685	1.11795
65.453		0.997171	1.01984	0.957836	1.09897	1.20094	1.13273	1.35	1.23317	1.22019	2.14047	1.49626	1.09901	1.14775	2.11048	1.72401	1.16752	1.51345	1.12184	1.42095	1.23602	1.00323	1.11493
67.137		1.015	1.02334	0.990453	1.13725	1.27383	1.10091	1.29833	1.20569	1.21525	2.06552	1.48083	1.00763	1.00339	2.04266	1.69063	1.16148	1.50404	1.11484	1.40918	1.22281	0.996284	1.10713
68.778		0.981612	0.991832	0.960223	1.12232	1.25327	1.07546	1.195	1.21232	1.20429	2.02385	1.46915	1.01328	1.00125	1.97716	1.66387	1.15284	1.50764	1.1101	1.402	1.21454	0.993178	1.10001
70.409		1.00424	1.0105	1.01352	1.11204	1.24019	1.11	1.2725	1.18863	1.20609	1.97793	1.4579	1.00371	1.00925	1.90483	1.63732	1.14446	1.50735	1.101	1.39891	1.21267	0.995736	1.09885
72.049		1.00566	0.984831	0.990453	1.09991	1.2028	1.04364	1.24167	1.15356	1.19147	1.91358	1.46815	1.00837	1.00954	1.85245	1.62838	1.13646	1.50992	1.10046	1.38648	1.20267	0.987513	1.10152
73.688		1.01697	1.01984	0.97852	1.01774	1.21121	1.04818	1.21417	1.16967	1.18869	1.86159	1.4392	1.00962	1.01195	1.79059	1.58887	1.13115	1.50985	1.09805	1.36937	1.19486	0.989767	1.08807
75.277		1.00707	1.02334	0.973747	1.00654	1.22804	1.15182	1.19583	1.16683	1.1808	1.80025	1.44443	1.00759	1.01537	1.76073	1.5519	1.12559	1.50257	1.09362	1.3601	1.19506	0.988183	1.08954
76.906		1	1.01984	1.00875	0.987862	1.2028	1.15182	1.19417	1.15071	1.18196	1.75894	1.4401	0.998059	1.01653	1.69611	1.51479	1.12174	1.49081	1.09253	1.33422	1.18799	0.984833	1.10424
78.565		1.02546	1.02334	0.964996	1.00467	1.2757	1.12273	1.20917	1.03981	1.18329	1.73457	1.41033	1.01345	1.02635	1.64122	1.47641	1.1146	1.46671	1.11966	1.3586	1.18646	0.982944	1.09661
80.236		0.997171	0.978997	0.945107	1.01401	1.29065	1.11454	1.27083	1.00853	1.17848	1.69634	1.40078	1.00716	1.02291	1.60646	1.44958	1.1149	1.4587	1.12285	1.35601	1.17718	0.980021	1.09726
81.892		1.02122	0.984831	0.965792	1.01401	1.2757	1.13273	1.24667	1.00758	1.17053	1.64619	1.38103	1.01013	1.02544	1.56606	1.41873	1.10917	1.44128	1.12519	1.34675	1.17485	0.980691	1.09135
83.58		1.00141	0.971995	0.989658	1.01401	1.16355	1.15091	1.25667	1.0237	1.17506	1.62416	1.37065	1.01272	1.03266	1.52654	1.38162	1.1063	1.42856	1.13498	1.33648	1.17598	0.980752	1.08609
85.259		1.00283	1.00934	0.996818	0.997199	1.14019	1.13364	1.32	1.01422	1.1605	1.59613	1.37095	0.996291	1.03025	1.49266	1.35782	1.10095	1.40592	1.13654	1.32855	1.17045	0.973564	1.08842
86.895		1.00566	1.00817	0.933174	1.02241	1.12336	1.11364	1.28583	1.00758	1.14733	1.5539	1.35207	0.995472	1.03044	1.46669	1.33739	1.09629	1.39152	1.13817	1.32396	1.16898	0.977767	1.08988
88.561		1.01414	1.0035	0.983294	0.988796	1.15981	1.12273	1.25167	1.01706	1.15917	1.53322	1.34211	1.00155	1.03574	1.4463	1.31782	1.09398	1.37667	1.1384	1.3197	1.16865	0.990254	1.08751
90.231		0.985856	0.996499	0.962609	1.00374	1.14766	1.1	1.21833	1.01611	1.16415	1.5071	1.33279	0.980164	1.0413	1.41813	1.29465	1.09308	1.34999	1.13615	1.31361	1.16171	0.996284	1.09316
91.882		0.981612	1.014	0.683373	1.00654	1.09813	0.843636	1.21833	1.02464	1.15075	1.47452	1.33454	0.96533	1.04182	1.4059	1.27035	1.09167	1.33243	1.13809	1.30476	1.16444	0.980264	1.08872
93.569		1.00424	0.982497	0.97136	1.03642	1.12617	1.05455	1.15917	0.905213	1.15255	1.44711	1.31292	0.952393	1.04166	1.37208	1.24352	1.09308	1.30825	1.13288	1.29174	1.15877	0.979655	1.08553
95.251		1.00566	1.0035	0.963405	0.993464	1.0514	1.10636	1.15917	1.02654	1.14936	1.43448	1.31599	0.955714	1.04712	1.36757	1.22465	1.0705	1.28987	1.12651	1.2879	1.15997	0.97393	1.09135
96.937		1.01697	0.992999	0.968178	0.919701	0.916822	1.08091	1.21083	1.02085	1.14002	1.4028	1.30001	0.999827	1.05543	1.35521	1.19838	1.06558	1.26951	1.11889	1.27713	1.16111	0.970214	1.0876
98.583		1.00707	0.991832	0.983294	0.989729	1.08972	1.07455	1.2125	0.923223	1.14913	1.3996	1.29986	1.00151	1.0533	1.37208	1.20887	1.06485	1.24732	1.11508	1.27546	1.17305	0.973381	1.08691
100.226		1	0.990665	1.02705	1.01774	1.07009	1.06091	1.20583	1.04265	1.14507	1.39766	1.28204	1.0028	1.05642	1.36757	1.21958	1.06442	1.22321	1.11337	1.25693	1.16091	0.973808	1.07897
101.873		1.02546	1.0105	1.00795	1.01307	1.1	1.08	1.20583	1.01706	1.15313	1.35332	1.29425	1.00824	1.06163	1.35521	1.22542	1.06451	1.2005	1.10831	1.24741	1.16264	0.974295	1.08316
103.556		0.997171	1.00934	0.968178	1.01681	1.09346	1.08	1.08972	1.00474	1.16415	1.35489	1.26731	1.00742	1.06044	1.35521	1.19944	1.06203	1.18823	1.09867	1.24483	1.1577	0.973564	1.07583
105.203		1.02122	0.978997	0.983294	1.0028	1.05981	1.09182	1.09346	1.00569	1.15075	1.35224	1.26325	1.01212	1.06412	1.16637	1.21275	1.06087	1.17308	1.08732	1.23923	1.15317	0.973686	1.09148
106.898		1.00141	0.984831	1.02705	1.00934	1.08972	1.08091	1.08972	1.03697	1.15255	1.32652	1.27774	1.00858	1.06444	1.3872	1.20528	1.06177	1.16213	1.08164	1.23531	1.1529	0.972468	1.09695
108.562		1.00283	0.971995	1.00795	1.01681	1.07009	1.07455	1.07009	1.07678	1.14936	1.32873	1.25346	1.01048	1.06492	1.37208	1.20359	1.06151	1.15545	1.11337	1.22713	1.15657	0.973625	1.07686
110.206		1.00566	1.00934	0.968178	1.01307	1.1	1.06091	0.916822	1.02749	1.14002	1.31629	1.24902	1.00871	1.06578	1.36757	1.28099	1.05518	1.14575	1.1356	1.22287	1.15704	0.971006	1.08807
111.851		1.01414	1.00817	0.983294	1.01681	1.12617	1.08	1.08972	1.05687	1.14913	1.29444	1.26018	1.00858	1.06778	1.35521	1.30246	1.05476	1.1395	1.14058	1.21553	1.15197	0.974112	1.09389
113.489		0.997171	1.0035	1.02705	1.0028	1.0514	1.08	1.09346	1.05592	1.16415	1.31162	1.24411	1.00768	1.07268	1.34981	1.33873	1.05634	1.12943	1.14385	1.20793	1.15864	0.970457	1.08682
115.146		1.02122	0.996499	1.00795	1.00934	0.916822	1.09182	1.08972	1.04455	1.15075	1.30194	1.24844	1.00979	1.07637	1.34391	1.35732	1.05356	1.1331	1.1454	1.2076	1.14723	0.970945	1.08316
116.822		1.00141	1.014	1.00795	1.01681	1.08972	1.08091	1.07009	1.05972	1.15255	1.32652	1.25118	1.00686	1.07748	1.33764	1.38613	1.06087	1.12744	1.14276	1.19925	1.1451	0.963574	1.07583
118.467		1.00283	0.982497	0.968178	1.0028	1.09346	1.07455	1.08972	1.03886	1.14936	1.32873	1.2343	0.994524	1.08387	1.33582	1.40887	1.0634	1.11855	1.14447	1.19374	1.14883	0.963209	1.09148
120.153		1.00566	1.0035	0.983294	1.00934	1.08972	1.06091	1.07009	1.19621	1.14002	1.31629	1.24876	1.00668	1.0794	1.33764	1.42753	1.07383	1.1198	1.14213	1.1889	1.1503	0.963087	1.09695
121.815		1.01414	0.992999	1.02705	1.01681	1.07009	1.08	1.16833	1.21991	1.14913	1.29444	1.25352	1.00686	1.08173	1.34391	1.47352	1.07003	1.11679	1.14478	1.17746	1.15277	0.964366	1.07686
123.48		1.02122	0.991832	1.00795	1.0028	1.1	1.08	1.2025	1.20569	1.14507	1.31162	1.25551	0.994524	1.08534	1.33764	1.5193	1.08834	1.11576	1.14299	1.17696	1.15717	0.963635	1.08807
125.125		1.00141	0.990665	1.02705	1.00934	1.09346	1.09182	1.26667	1.22275	1.15313	1.30194	1.2376	1.00668	1.08173	1.33582	1.54732	1.08688	1.10819	1.14696	1.16878	1.1527	0.963574	1.08807
126.808		1.00283	1.0105	1.00795	1.00934	1.4486	1.20182	1.40917	1.28531	1.15313	1.31162	1.24379	1.0765	1.08534	1.33764	1.69585	1.07743	1.09929	1.27105	1.16828	1.24997	0.966681	1.48771
128.445		1.2	1.00934	1.965	2.42484	2.03832	2.33454	1.66417	1.2436	1.6239	1.30194	1.2272	1.54614	2.50676	1.42171	1.74155	1.05253	1.099	1.59226	1.32546	2.22335	2.31346	1.54592
130.084		2.04809	1.86698	1.95068	2.40056	2.08037	2.76091	1.74083	1.2673	2.32599	1.91217	1.95308	1.74286	3.6799	2.60019	1.99	1.30705	1.78201	2.18716	1.76962	2.31134	2.50094	1.74261
131.727		2.25601	2.1937	1.90931	2.44725	2.15421	2.79454	1.80667	1.29858	2.34669	2.01884	2.63604	1.67482	3.80123	2.88727	1.96958	1.77106	1.77774	2.16663	1.79649	2.32642	2.50984	1.67458
133.375		1.87553	1.92182	1.99602	2.53035	2.15047	2.87091	1.85333	1.26635	2.39182	2.69478	2.61377	1.62876	3.85856	2.93513	1.94289	1.79557	1.75658	2.11749	1.79983	2.33756	2.49047	1.62853
135.057		1.64639	1.64527	1.97613	2.74416	2.25327	2.91818	1.8625	1.30995	2.37842	2.66134	2.7804	1.58129	3.89143	2.92422	1.93303	1.77906	1.73379	2.05676	1.78397	2.32422	2.44801	1.58106

## Sheet: Fig 3 - H
	WT		Cluster KO
1% DMSO	1.03	0.69	0.57
50μM Bilirubin	5.43	1.8	1.9

## Sheet: Fig 3 - I
X4													A1												X3
t
0.6	1	1	1	1	1	1	1	1	0.999919	1	1		t
2.081	0.998227	1.00027	1.00424	0.998913	0.999381	1.00242	0.997052	0.999083	0.998383	0.993361	1.00055		0.579				1	1	1	1	1	1			t
3.57	0.99675	0.99734	0.999674	1.00251	0.996829	1.00043	0.996598	0.997083	0.999272	0.99836	0.998435		2.103				0.998566	0.998087	0.996915	0.999589	0.995796	0.992851			0.574		1	1	0.999942	1	1.00006	1	1	1	1	1	1
5.039	1.00089	0.996675	1	1.00163	0.999768	1.00278	0.994557	0.998167	0.998302	0.996798	1.00157		3.584				0.999245	0.998316	0.999525	1.00057	0.996223	0.996958			2.081		1.00502	1.00459	1.00201	0.99702	0.998614	0.997891	1.00295	0.998063	1.00013	1.00522	1.00164
6.518	0.998523	0.997074	1.00104	1.00564	0.998376	1.00335	0.999471	0.997167	0.99612	1.00312	1.00023		5.076				0.998792	0.997627	0.999763	1.00099	0.996527	0.996273			3.54		0.998944	1.00025	1.00334	1.00043	0.995422	0.997827	1.00485	1.00087	0.999119	1.00136	1.00335
8.01	0.999187	0.998869	0.997589	1.00014	1.00093	1.00206	0.995842	0.994	0.999272	1.0032	0.996557		6.633				1.00136	0.998087	0.997943	1.00156	0.994212	0.995741			5.05		0.998151	1.001	1.00322	1.00081	0.997771	0.999489	1.00473	0.998438	1.00202	1.00445	1.00335
9.48	0.997119	0.998603	1.00411	1.00795	0.999149	0.9958	0.997505	0.994583	0.999515	1.00063	0.998592		8.171				1	1	0.99731	0.999918	0.991287	0.99673			6.551		0.997729	0.998454	1.00052	0.998808	0.991687	0.997571	1.00068	0.998813	0.997544	1.0003	1.0002
10.962	0.991431	0.9865	0.988922	0.993275	0.991957	0.992454	0.993423	0.985583	0.987389	0.989924	0.989907		9.687				0.986943	0.986836	0.991298	0.987915	0.990678	0.996197			8.044		1.00333	1.00314	1.00402	1.00125	0.990783	1.00121	1.00811	1.00456	1.00321	1.00611	1.00374
12.45	1.35444	1.52823	1.27716	2.02704	1.45921	1.62903	1.37065	1.48758	1.11625	1.1723	1.19858		11.222				0.984377	0.995867	0.987659	0.990053	0.994578	0.99673			9.52		1.00576	1.00728	1.00656	1.00461	0.996687	1.00473	1.00854	1.00356	1.00762	1.0112	1.00748
13.919	1.77129	1.75627	1.63571	2.22091	1.59609	1.93621	1.58762	1.54725	1.15635	1.21128	1.33612		12.746				1.24347	1.38214	1.11637	1.12175	1.18254	1.32743			10.996		1.00523	1.00703	1.00684	1.00336	0.996446	1.00377	1.00983	1.00856	1.00516	1.00877	1.00729
15.399	2.01322	1.79211	1.72023	2.21004	1.68193	1.87058	1.68529	1.522	1.18416	1.23822	1.38604		14.288				1.2123	1.41153	1.13346	1.14082	1.3256	1.36165			12.479		1.00586	1.00683	1.00794	1.00704	0.995482	1.00396	1.01431	1.00825	1.00894	1.00907	1.00952
16.904	1.92236	1.75128	1.76963	2.14245	1.67234	1.78287	1.76217	1.53017	1.18666	1.21745	1.40818		15.824				1.16566	1.4413	1.12823	1.15455	1.42149	1.37268			13.971		1.00549	1.00524	1.00535	1.00331	0.998313	1.00332	1.00798	1.00537	1.00302	1.00528	1.00578
18.435	1.82736	1.70612	1.80065	2.10122	1.66685	1.72179	1.76134	1.52292	1.15683	1.18769	1.40193		17.371				1.12075	1.44719	1.10798	1.15373	1.48254	1.3812			15.436		1.00396	1.00693	0.998217	1.00011	0.996988	1.00115	0.999693	0.995877	0.990933	0.991641	0.995732
19.952	1.75371	1.64089	1.76976	2.06528	1.67891	1.63636	1.7401	1.47892	1.12288	1.15036	1.37587		18.892				1.0914	1.45025	1.07919	1.15349	1.52081	1.37892			16.918		1.00681	1.00175	0.994307	1.00076	0.990181	1.00243	0.997113	0.995877	0.989611	0.989032	0.992844
21.432	1.69336	1.59447	1.74747	2.06195	1.68316	1.5755	1.75726	1.4735	1.12514	1.1477	1.35662		20.444				1.06128	1.44344	1.05403	1.14247	1.54646	1.39641			18.401		1.00042	1.00389	0.991834	0.997995	0.98994	1.00147	0.997298	0.997626	0.990429	0.984823	0.992909
22.904	1.61299	1.55237	1.73255	2.16425	1.65308	1.49562	1.74017	1.44958	1.09014	1.10997	1.31648		21.936				1.03879	1.42331	1.03544	1.13392	1.56583	1.3834			19.875		1.00111	1.00135	0.988729	0.996965	0.988132	1.00217	0.999447	0.992316	0.989359	0.989448	0.991859
24.394	1.53461	1.53674	1.75621	2.16025	1.64094	1.41333	1.80995	1.47167	1.08327	1.09014	1.30131		23.487				1.02332	1.41283	1.02001	1.12718	1.57217	1.37823			21.376		1.00438	1.00309	0.988039	0.993172	0.981928	1.00575	0.993551	0.987443	0.992255	0.984053	0.99002
25.879	1.51215	1.49644	1.74669	2.17791	1.6704	1.38193	1.85062	1.47417	1.09733	1.11208	1.29113		24.995				1.04672	1.44704	1.03781	1.1497	1.60665	1.37245			22.888		0.996725	1.00289	0.984129	0.988566	0.973916	1.00524	0.99349	0.975011	0.996726	0.969647	0.984046
27.344	1.45365	1.46479	1.74089	2.15393	1.66151	1.32825	1.8383	1.48433	1.08812	1.10466	1.26649		26.536				1.02491	1.41099	1.01574	1.1123	1.61622	1.35823			24.369		1.00634	1.00249	0.985106	0.988295	0.983253	1.00837	0.998833	0.975511	0.996474	0.974626	0.988904
28.821	1.39492	1.42947	1.74259	2.1091	1.65393	1.27415	1.81615	1.45417	1.07639	1.08748	1.24865		28.097				0.984755	1.35083	0.981252	1.06593	1.61762	1.35367			25.846		0.99625	1.0002	0.982634	0.989325	0.983434	1.00876	0.999447	0.975323	0.994648	0.974389	0.985622
30.311	1.33065	1.38891	1.71339	2.05584	1.64001	1.21877	1.78954	1.42517	1.0633	1.07818	1.21735		29.6				0.974189	1.3327	0.973103	1.04916	1.60038	1.35503			27.347		0.999208	1.00214	0.986889	0.991221	0.98241	1.0032	0.997543	0.978697	0.992948	0.978184	0.985753
31.784	1.26069	1.33112	1.69215	2.0017	1.60568	1.16345	1.74728	1.39633	1.02094	1.04132	1.16305		31.153				0.997736	1.34846	0.991931	1.0633	1.58527	1.34728			28.814		1.00095	1.00289	0.985681	0.990896	0.98	1.00678	0.995332	0.978884	0.996222	0.974508	0.987854
33.268	1.21209	1.28995	1.65037	1.95197	1.59299	1.12707	1.73813	1.39108	1.01657	1.03421	1.14248		32.692				1.0006	1.33958	0.99027	1.05656	1.56772	1.3469			30.294		0.998891	0.999452	0.986256	0.990571	0.983193	1.00639	0.993121	0.977822	0.995656	0.971425	0.98897
34.748	1.20241	1.28895	1.66758	1.95965	1.61905	1.11661	1.77117	1.4055	1.03007	1.05022	1.14013		34.188				0.996453	1.32673	0.989083	1.04513	1.55657	1.32826			31.768		0.994771	0.997407	0.983726	0.988837	0.979157	1.00722	0.993183	0.973699	0.995152	0.976583	0.987854
36.221	1.17286	1.26222	1.64223	1.93506	1.60792	1.10045	1.76194	1.40792	1.03298	1.05132	1.12433		35.73				0.995924	1.31073	0.988371	1.03757	1.52775	1.3186			33.251		1.00312	0.99985	0.985336	0.991872	0.986084	1.00946	0.995701	0.978135	0.995026	0.97765	0.987329
37.715	1.14745	1.23761	1.63102	1.91352	1.60823	1.08144	1.75227	1.4085	1.03266	1.05007	1.10234		37.276				0.993283	1.29267	0.987896	1.02803	1.52221	1.30461			34.725		1.00428	0.999452	0.986889	0.992251	0.981506	1.01042	0.99478	0.974136	0.997481	0.977591	0.98851
39.189	1.12536	1.20995	1.6056	1.89749	1.59709	1.07162	1.73511	1.39992	1.02862	1.04491	1.08724		38.84				0.993057	1.27859	0.98671	1.01957	1.50917	1.30613			36.209		0.999366	1.00005	0.983841	0.987753	0.979759	1.00869	0.99048	0.974011	0.994144	0.971307	0.984965
40.665	1.10652	1.18867	1.59609	1.87127	1.58565	1.05845	1.7249	1.40033	1.0232	1.03687	1.06956		40.384				0.993585	1.26818	0.98758	1.01628	1.49631	1.30864			37.698		0.997993	0.993518	0.982749	0.987699	0.975542	1.00345	0.982987	0.969951	0.98917	0.971722	0.980172
42.152	1.09057	1.16865	1.57282	1.85701	1.56987	1.05161	1.70948	1.3935	1.01981	1.03695	1.05876		41.931				0.991849	1.25119	0.986077	1.00987	1.4887	1.30103			39.18		1.0009	0.995612	0.980966	0.983743	0.971145	1.00269	0.987471	0.967639	0.988792	0.969172	0.979712
43.641	1.0803	1.15635	1.56357	1.8475	1.56229	1.04663	1.69897	1.38858	1.02053	1.0357	1.05407		43.447				0.990792	1.24101	0.986947	1.00748	1.46938	1.28871			40.656		0.998363	0.998853	0.983611	0.985965	0.975	1.00754	0.987409	0.970325	0.988918	0.972374	0.982536
45.163	1.07483	1.14877	1.55927	1.84451	1.55518	1.04108	1.69625	1.38933	1.02158	1.03796	1.04718		44.994				0.992981	1.23159	0.985919	1.00625	1.4544	1.28339			42.134		0.998944	1.0016	0.986487	0.986128	0.978855	1.00741	0.988453	0.972949	0.996159	0.973856	0.985687
46.64	1.06575	1.13301	1.5553	1.82916	1.54489	1.03695	1.68068	1.38158	1.02029	1.03913	1.04092		46.521				0.992981	1.22241	0.984811	1.00633	1.44148	1.28096			43.607		1.00185	0.99646	0.985911	0.986182	0.98006	1.01061	0.987962	0.973699	0.995844	0.975634	0.986935
48.131	1.06124	1.12556	1.54728	1.81632	1.53716	1.03723	1.67932	1.38142	1.01956	1.03952	1.03544		48.074				0.991019	1.21208	0.984732	1.00247	1.43179	1.26787			45.106		1.00005	1.00249	0.988097	0.989596	0.983072	1.00991	0.994595	0.975448	0.996285	0.976286	0.98897
49.874	1.05865	1.11206	1.53464	1.80355	1.52223	1.03182	1.67403	1.37558	1.01924	1.04288	1.03404		49.591				0.990717	1.20144	0.985998	0.99704	1.41674	1.25867			46.571		1.00169	1.0013	0.988212	0.986236	0.979639	1.01055	0.98962	0.973137	0.996663	0.975812	0.987657
51.304	1.05156	1.10654	1.52212	1.80708	1.51257	1.02698	1.65906	1.37333	1.02061	1.03866	1.03145		51.115				0.989811	1.19394	0.987343	0.99704	1.40279	1.24734			48.046		1.00407	1.00568	0.990684	0.988729	0.983253	1.00991	0.993367	0.977447	0.99767	0.974389	0.989692
53.193	1.05348	1.0953	1.5158	1.79723	1.49988	1.02976	1.64726	1.36533	1.01908	1.03687	1.02566		52.64				0.992	1.18667	0.98584	0.993834	1.38744	1.2376			49.535		1.00644	1.00389	0.988902	0.992739	0.987771	1.01304	0.992507	0.976885	0.995907	0.976879	0.986344
55.093	1.04743	1.09131	1.51502	1.78969	1.49138	1.02805	1.64477	1.367	1.02005	1.03577	1.02801		54.185				0.991094	1.18131	0.984891	0.992683	1.36715	1.22422			51.008		1.00232	1.00658	0.988557	0.989	0.985241	1.00767	0.989313	0.971512	0.99427	0.975042	0.985884
56.54	1.04698	1.08173	1.5016	1.78276	1.48225	1.02456	1.62731	1.36	1.02013	1.03804	1.02746		55.713				0.991623	1.17327	0.985444	0.992765	1.35173	1.23228			52.498		1.00253	1.0017	0.990167	0.984719	0.982711	1.00844	0.989068	0.974074	0.993703	0.975575	0.987919
58.398	1.04646	1.07661	1.48948	1.77298	1.463	1.02164	1.61582	1.35575	1.0194	1.03117	1.0223		57.244				0.992	1.17006	0.987976	0.993341	1.33991	1.22977			53.981		1.00037	0.999152	0.985796	0.987374	0.98012	1.00588	0.990296	0.971512	0.993641	0.975397	0.984046
60.299	1.0461	1.07601	1.47748	1.76999	1.45782	1.02627	1.60916	1.36183	1.02167	1.0353	1.02418		58.779				0.98883	1.16677	0.986552	0.993177	1.32639	1.21859			55.449		1.00248	1.0003	0.986831	0.986399	0.979578	1.00933	0.988945	0.975261	0.9932	0.974804	0.984374
61.799	1.04447	1.07382	1.46347	1.76517	1.44869	1.02755	1.59457	1.35908	1.02078	1.0389	1.0216		60.296				0.982566	1.15169	0.983783	0.986846	1.31591	1.19547			56.923		1.00079	0.998404	0.985969	0.988783	0.979398	1.01061	0.987532	0.972449	0.992759	0.97599	0.984571
63.279	1.04499	1.0683	1.45213	1.75987	1.43546	1.02292	1.58875	1.35317	1.01851	1.03562	1.02277		61.813				0.978792	1.14641	0.981252	0.987011	1.30555	1.17965			58.427		1.00259	0.996958	0.985221	0.983906	0.981325	1.00889	0.986365	0.974199	0.994522	0.978184	0.985162
64.762	1.04085	1.06657	1.44881	1.75192	1.42371	1.02036	1.57484	1.34983	1.01851	1.03663	1.02058		63.328				0.986264	1.13983	0.979827	0.986353	1.30141	1.16824			59.945		0.998363	0.99631	0.984704	0.983039	0.977771	1.00569	0.988453	0.971512	0.990744	0.970892	0.980369
66.25	1.04129	1.06584	1.43526	1.75504	1.41667	1.03104	1.57802	1.35117	1.01989	1.0353	1.02355		64.871				0.983019	1.13256	0.977692	0.976981	1.29215	1.15539			61.413		1.00412	1.00274	0.984704	0.989758	0.981928	1.01029	0.991647	0.973324	0.995089	0.975931	0.984899
67.712	1.03893	1.06471	1.42079	1.74873	1.41126	1.03381	1.57151	1.35233	1.02158	1.03733	1.02293		66.434				0.979774	1.11955	0.974132	0.975912	1.28002	1.13599			62.897		1.00317	0.997557	0.988787	0.986344	0.98006	1.01221	0.992446	0.974699	0.992948	0.977294	0.982404
69.19	1.03804	1.06604	1.41017	1.74159	1.40113	1.0341	1.55541	1.3465	1.02304	1.03546	1.023		67.982				0.978868	1.10899	0.977533	0.974022	1.27168	1.12694			64.38		1.0074	1.001	0.989132	0.988241	0.983253	1.01521	0.988699	0.976198	0.994963	0.97267	0.983192
70.679	1.03871	1.06464	1.40196	1.75131	1.39456	1.03531	1.54869	1.34533	1.01948	1.03733	1.02316		69.514				0.976981	1.10202	0.974527	0.975502	1.26059	1.11956			65.863		0.997729	0.994914	0.985624	0.984556	0.976084	1.01937	0.986611	0.973824	0.993137	0.973026	0.981813
72.156	1.02608	1.05466	1.37713	1.72991	1.37368	1.02691	1.52601	1.33192	1.00509	1.02351	1.00915		71.028				0.973509	1.08595	0.973262	0.971884	1.25145	1.09522			67.353		1.00565	0.999501	0.986602	0.989216	0.979458	1.02141	0.990296	0.973449	0.996096	0.972729	0.982339
73.641	1.02593	1.04762	1.36696	1.7295	1.36092	1.0309	1.51164	1.32783	1.00388	1.02046	1.00822		72.566				0.972075	1.08427	0.968832	0.962841	1.24414	1.08762			68.838		1.00275	1.00085	0.985739	0.988295	0.976747	1.01803	0.988392	0.974761	0.993515	0.976227	0.982207
75.115	1.01256	1.03112	1.33926	1.68134	1.33524	1.01182	1.47399	1.31858	0.993775	1.01687	0.99867		74.105				0.999774	1.09169	0.995728	0.992026	1.22708	1.08381			70.299		1.00486	0.997357	0.986487	0.990896	0.979398	1.02519	0.988269	0.974074	0.996033	0.97516	0.983061
76.61	1.01344	1.0256	1.33314	1.69296	1.32124	1.01168	1.45389	1.31242	0.996847	1.01945	0.995071		75.677				1.00302	1.08733	0.999367	0.993588	1.21611	1.06556			71.803		1.0029	0.997856	0.986314	0.985152	0.977831	1.02582	0.9922	0.972012	0.994018	0.976227	0.982733
78.076	1.01256	1.02986	1.32584	1.69968	1.3091	1.01516	1.44383	1.32183	1.00105	1.0257	1.0007		77.203				1.00121	1.08304	0.995728	0.99219	1.20819	1.061			73.336		1.0074	1.0007	0.988902	0.991221	0.984217	1.03075	0.994411	0.975198	0.994522	0.97848	0.986015
79.556	1.02342	1.02806	1.31183	1.70233	1.29425	1.01139	1.42342	1.317	0.997171	1.01476	0.997183		78.714				0.999472	1.07194	0.992247	0.992848	1.20453	1.05263			74.855		1.00534	0.995313	0.984646	0.985748	0.97741	1.03414	0.986918	0.974574	0.993578	0.974508	0.984505
81.014	1.02549	1.02367	1.29723	1.70525	1.27801	1.00456	1.41457	1.32	0.999838	1.01328	0.99554		80.253				1.00076	1.06743	0.995649	0.992272	1.19905	1.04731			76.342		1.00401	0.996161	0.983841	0.985532	0.981084	1.03151	0.985874	0.974136	0.991122	0.973441	0.983455
82.515	1.01876	1.01403	1.28335	1.69058	1.26997	1.00036	1.37708	1.31375	0.994503	1.00539	0.991002		81.802				1.00257	1.06138	0.995016	0.991615	1.18808	1.03902			77.806		1.00248	0.993718	0.984416	0.985206	0.978735	1.03292	0.987409	0.973824	0.989233	0.971129	0.981879
84.005	1.0297	1.00253	1.21636	1.54507	1.25419	1.01111	1.26482	1.25467	1.00275	1.01742	0.99468		83.323				1.00151	1.05533	0.993118	0.989477	1.18626	1.03423			79.283		1.0037	0.994864	0.984129	0.981901	0.976566	1.02953	0.983663	0.973699	0.989485	0.972789	0.9805
85.474	1.04041	1.02434	1.25285	1.68834	1.26773	1.02456	1.33437	1.30875	1.02053	1.03171	1.01565		84.853				1.00136	1.04959	0.993671	0.985531	1.18138	1.02099			80.771		1.01109	0.998654	0.988097	0.990409	0.982651	1.03835	0.989006	0.977135	0.994648	0.976286	0.986803
86.976	1.0379	1.02753	1.24614	1.68127	1.25427	1.02677	1.3135	1.30333	1.02037	1.03007	1.0126		86.344				0.999019	1.0476	0.993039	0.986106	1.17041	1.01841			82.245		1.0149	1.0001	0.985221	0.989867	0.985904	1.03484	0.991954	0.977822	0.994144	0.983282	0.990414
88.579	1.03479	1.02188	1.23682	1.68263	1.24693	1.02435	1.29906	1.30408	1.01811	1.02796	1.01275		87.848				0.999396	1.0473	0.994067	0.983722	1.16676	1.01247			83.727		1.0113	1.00489	0.989132	0.990734	0.986506	1.03548	0.99263	0.976198	0.994333	0.978302	0.989626
90.065	1.03376	1.02175	1.22405	1.68052	1.24584	1.01993	1.28009	1.30317	1.01706	1.02585	1.01197		89.404				0.999924	1.04324	0.998181	0.983887	1.16006	1.0146			85.221		1.01289	1.00359	0.989017	0.990517	0.984699	1.03931	0.992568	0.979946	0.996222	0.979369	0.994485
91.992	1.03184	1.02387	1.20749	1.67373	1.23293	1.02043	1.26081	1.29867	1.0135	1.02703	1.01213		90.923				0.983849	1.02602	0.985602	0.973939	1.15274	1.00472			86.684		1.00703	0.997158	0.987119	0.990029	0.985723	1.03797	0.993551	0.976448	0.995026	0.978599	0.98897
93.729	1.02859	1.02175	1.19596	1.68161	1.22636	1.01765	1.24486	1.3015	1.01528	1.02734	1.01009		92.474				1.78083	1.97291	2.19706	1.4099	1.14604	1.00015			88.173		1.01067	0.997507	0.987694	0.988675	0.983193	1.04123	0.996438	0.97801	0.997796	0.978243	0.993106
95.257	1.03051	1.02314	1.18306	1.67305	1.22148	1.01822	1.23639	1.30142	1.01544	1.02671	1.01103		93.987				1.83223	2.00467	2.26493	1.41023	1.95028	1.61751			89.64		1.00819	0.997706	0.988039	0.989325	0.984157	1.04193	0.99435	0.977822	0.995718	0.977709	0.992909
96.736	1.02593	1.01583	1.16957	1.67584	1.21228	1.01388	1.22067	1.30308	1.01431	1.02078	1.0115		95.492				1.83917	1.99273	2.22063	1.39329	2.4391	1.69638			91.126		1.00264	0.989878	0.982864	0.987482	0.983614	1.03554	0.993183	0.973949	0.99723	0.974804	0.987722
98.216	1.02172	1.01383	1.15894	1.66388	1.20818	1.01274	1.21288	1.29067	1.0156	1.02382	1.0072		96.997				1.81328	1.97252	2.16233	1.37241	2.42698	1.67622			92.614		0.999472	0.989928	0.978206	0.984231	0.974699	1.03912	0.989313	0.972137	0.994774	0.969647	0.99002
99.694	1.0263	1.0151	1.15243	1.67006	1.20679	1.01872	1.20336	1.29658	1.01843	1.02804	1.01322		98.534				1.79698	1.95622	2.1151	1.36	2.40218	1.6531			94.11		1.00074	0.988831	0.980218	0.983418	0.975181	1.04136	0.994841	0.976073	0.990996	0.969943	0.987985
101.191	1.0246	1.0145	1.1448	1.66334	1.1989	1.01666	1.19134	1.29175	1.0211	1.02648	1.01095		100.037				1.78558	1.94091	2.08211	1.35219	2.37013	1.61568			95.633		1.00169	0.990876	0.981369	0.984827	0.980482	1.04117	0.997113	0.97751	0.993515	0.970773	0.989561
102.655	1.01972	1.01303	1.13653	1.66103	1.19558	1.01495	1.18302	1.29108	1.01843	1.02499	1.01142														97.113		0.997412	0.988133	0.982519	0.983364	0.975964	1.03982	0.99828	0.978697	0.994018	0.97184	0.988576
104.131	1.02172	1.01177	1.11958	1.66626	1.19449	1.0136	1.16881	1.28683	1.0194	1.02398	1.01009														98.574		0.99419	0.983995	0.977976	0.976428	0.971747	1.03036	0.998772	0.978135	0.992759	0.96935	0.986278
105.622	1.01374	1.00998	1.10844	1.6505	1.18073	1.00363	1.15475	1.28075	1.01027	1.01625	1.00227														100.06		1.00063	0.985889	0.978493	0.980492	0.973916	1.03279	0.996684	0.980134	0.991689	0.969172	0.985687
107.099	2.54259	2.21327	1.28746	2.11752	1.87874	2.54731	1.77699	1.54408	1.92191	2.24611	2.03012														101.553		0.996302	0.985391	0.977228	0.978108	0.974819	1.03139	0.997605	0.977322	0.988163	0.967275	0.984637
108.574	2.84753	2.50835	1.39231	2.18749	1.92661	2.73859	1.90331	1.55975	2.08884	2.3557	2.28464														103.019		0.989277	0.981203	0.973548	0.971822	0.973735	1.03081	0.997482	0.976635	0.986966	0.963125	0.980303
110.061	2.81547	2.51693	1.42698	2.16853	1.90836	2.68014	1.88691	1.54625	2.05158	2.28634	2.27064														104.499		0.990545	0.980156	0.969983	0.973285	0.963253	1.03535	0.993674	0.971887	0.9881	0.959391	0.975642
111.539	2.75748	2.48959	1.43793	2.14435	1.89289	2.61857	1.88524	1.54417	2.01884	2.22776	2.22862														105.992		0.981777	0.977712	0.967108	0.973556	0.968795	1.03695	0.993735	0.973824	0.9864	0.957731	0.971965
113.012	2.71427	2.46113	1.46198	2.12907	1.87936	2.55891	1.86687	1.53633	1.9844	2.17066	2.18504														107.459		0.981882	0.976266	0.965037	0.970846	0.964036	1.03682	0.988024	0.971575	0.986777	0.960458	0.974526
																									108.952		0.983995	0.978211	0.966302	0.969654	0.963855	1.03982	0.990849	0.974761	0.983692	0.959628	0.970192
																									110.414		0.981724	0.976915	0.967223	0.974043	0.966747	1.04385	0.992016	0.973761	0.985455	0.958798	0.971899
																									111.899		0.982358	0.970682	0.96498	0.972364	0.961265	1.04379	0.988269	0.97095	0.983	0.955478	0.968223
																									113.402		0.982569	0.980255	0.966187	0.973176	0.966145	1.04276	0.992876	0.976635	0.985581	0.959391	0.971899
																									114.911		0.984471	0.980505	0.966935	0.976048	0.96494	1.04666	0.989927	0.975261	0.983314	0.95779	0.969733
																									116.388		0.980403	0.976416	0.967395	0.977132	0.962048	1.0551	0.987594	0.975261	0.984196	0.960991	0.970127
																									117.874		0.984629	0.979208	0.967223	0.979788	0.96259	1.05849	0.991954	0.977635	0.986274	0.965793	0.975248
																									119.36		0.983573	0.976117	0.964692	0.979354	0.96488	1.05823	0.989743	0.977135	0.983377	0.959628	0.972425
																									120.827		0.989436	0.975369	0.96912	0.980709	0.965843	1.06149	0.995209	0.978135	0.985392	0.963066	0.976167
																									122.312		0.989225	0.977164	0.97165	0.983147	0.966386	1.06699	0.995578	0.985132	0.989485	0.962414	0.97794
																									123.796		0.986584	0.973674	0.96682	0.976482	0.961084	1.06546	0.993797	0.988568	0.991122	0.964607	0.981419
																									125.256		0.982199	0.972178	0.966187	0.97995	0.960181	1.07012	0.994718	0.992378	0.988289	0.962533	0.984637
																									126.767		0.986003	0.975768	0.966762	0.9806	0.963554	1.07696	0.999509	0.995939	0.990744	0.965853	0.988642
																									128.226		0.987957	0.976965	0.970213	0.98396	0.965241	1.08508	0.998895	1.00162	0.993074	0.96443	0.995404
																									129.712		0.987904	0.979358	0.970155	0.982118	0.965723	1.09198	0.999447	1.00687	0.992004	0.963896	0.995076
																									131.197		0.989541	0.973524	0.967683	0.979733	0.961988	1.09761	0.999509	1.00731	0.992129	0.966979	0.997374
																									132.675		0.993873	0.980804	0.970443	0.981413	0.964337	1.09908	0.99828	1.00968	0.990178	0.971129	0.999344
																									134.147		0.996989	0.996111	1.21392	1.00666	0.991807	1.30191	1.02033	1.00069	1.00132	0.993716	1.0111
																									135.618		2.58266	1.99731	1.83105	1.91481	1.84211	1.81763	3.37747	2.20241	2.45681	2.88185	1.88648
																									137.111		3.27699	2.46575	1.86601	2.66566	2.17988	2.00326	3.50227	2.47654	2.64866	3.09302	1.91636
																									138.582		3.38707	2.57359	1.85911	2.82324	2.22126	2.04909	3.48237	2.55501	2.64154	3.07363	1.89804
																									140.094		3.37682	2.59199	1.84457	2.82714	2.2056	2.04941	3.45357	2.56744	2.60314	3.0115	1.87473

## Sheet: Fig 3 - J
Uninfected	mrgprA1	MRGPRX4	MRGPRX3
1.3	14	32	0
