# Supplementary material for: Identification of a bilirubin receptor that may mediate a component of cholestatic itch
Source: eLife. 2019 Jan 21;8:e44116. doi: 10.7554/eLife.44116 (PMC6368403; doi:10.7554/eLife.44116)
Supplement: Figure 4—source data 1. [file elife-44116-fig4-data1.xlsx]

## Sheet: Fig 4 - B
t
0.572		1.00006	1	1	1	1	1.00002	1	1.00002	1.00003	1
2.591		1.00045	1.00246	1.00246	0.981658	0.999878	1.00518	1.00107	0.999074	1.00208	0.981658
4.572		1.00175	0.996849	0.996849	0.958308	1.00073	1.00362	1.00221	1.007	1.01881	0.958308
6.578		1.00097	1.00934	1.00934	0.953573	0.999572	1.00197	0.999378	1.00657	1.01377	0.953573
8.544		1.00566	1.00591	1.00591	0.949231	0.998473	0.998214	0.996492	0.99762	1.01017	0.949231
10.559		1.00418	1.00354	1.00354	0.94494	0.991206	0.99623	0.989872	1.00381	1.01175	0.94494
12.608		0.996731	0.998398	0.998398	0.929675	0.998962	0.998106	0.996775	1.00227	1.01188	0.929675
14.593		0.996537	0.997508	0.997508	0.921282	0.992061	0.995148	0.993153	1.0058	1.00992	0.921282
16.573		0.985081	1.00733	1.00733	0.908239	0.993038	0.99201	0.990211	1.00421	1.00559	0.908239
18.582		0.970291	1.00401	1.00401	0.911641	0.994931	0.991252	0.9957	1.00438	1.00082	0.911641
20.582		0.964078	1.00392	1.00392	0.917128	0.999084	0.99421	0.999943	1.00717	1.00116	0.917128
22.556		0.971197	1.03085	1.36898	1.27892	1.32195	0.990098	1.26821	1.05524	1.2355	1.27892
24.599		0.996149	1.36898	2.81216	3.27908	1.61331	1.21812	1.36864	1.0389	1.72773	3.27908
26.583		1.07443	2.81216	2.69603	3.24928	1.78663	1.19665	1.44605	1.685	1.57926	3.24928
28.609		1.18473	2.69603	2.57413	3.09841	1.81588	1.07007	1.50269	1.49114	1.42975	3.09841
30.585		1.37728	2.57413	2.42407	3.05169	1.82895	1.01466	1.53505	1.35341	1.32226	3.05169
32.553		1.4387	2.42407	2.38368	3.08347	1.83121	0.999585	1.52883	1.25785	1.24234	3.08347
34.545		1.57777	2.38368	2.37487	3.04149	1.81264	1.15896	1.49726	1.17751	1.1918	3.04149
36.549		1.63007	2.37487	2.23608	2.93443	1.76073	1.15961	1.50687	1.12566	1.15256	2.93443
38.508		1.69337	2.23608	2.13319	2.87227	1.73185	1.28954	1.50733	1.08845	1.123	2.87227
40.506		1.77676	2.13319	2.01486	2.76877	1.70412	1.23785	1.47428	1.0659	1.10587	2.76877
42.51		1.66667	2.01486	1.9404	2.66038	1.6629	1.33564	1.44627	1.05164	1.09863	2.66038
44.514		1.58392	1.9404	1.85952	2.57405	1.57844	1.41789	1.44135	1.04195	1.08685	2.57405
46.528		1.71544	1.85952	1.78438	2.48954	1.54937	1.28478	1.41747	1.03588	1.08291	2.48954
48.504		1.78544	1.78438	1.73977	2.42292	1.5269	1.19626	1.40723	1.03471	1.07799	2.42292
50.488		1.78217	1.73977	1.71627	2.35528	1.56086	1.13746	1.41051	1.03049	1.0728	2.35528
52.476		1.77405	1.71627	1.69475	2.29545	1.56464	1.09002	1.41125	1.03043	1.07405	2.29545
54.496		1.67761	1.69475	1.56817	2.23954	1.53905	1.05939	1.41272	1.02137	1.06394	2.23954
56.513		1.71913	1.56817	1.55549	2.1813	1.54394	1.05315	1.40395	1.02468	1.0604	2.1813
58.52		1.74612	1.55549	1.57636	2.14703	1.5473	1.0371	1.40497	1.0184	1.06007	2.14703
60.512		1.73369	1.57636	1.54976	2.1162	1.51621	1.04121	1.39105	1.00438	1.05665	2.1162
62.541		1.7221	1.54976	1.53114	2.07191	1.50107	1.03162	1.36921	1.00717	1.06211	2.07191
64.549		1.58453	1.53114	1.50907	2.04511	1.48763	1.03194	1.36117	1.02006	1.06623	2.04511
66.533		1.53916	1.50907	1.48322	2.00463	1.4444	0.985048	1.37147	1.02211	1.06394	2.00463
68.532		1.63576	1.48322	1.46514	1.99308	1.44794	0.992046	1.36123	1.02049	1.0604	1.99308
70.516		1.61133	1.46514	1.44856	1.95971	1.43139	0.976931	1.36706	1.02579	1.06007	1.95971
72.544		1.5734	1.44856	1.43411	1.92956	1.44073	0.979348	1.38307	1.02505	1.05665	1.92956
74.501		1.50045	1.43411	1.43612	1.90417	1.42602	0.984687	1.39473	1.03006	1.06211	1.90417
76.495		1.42528	1.41777	1.44956	1.88896	1.43304	0.987284	1.40225	1.02887	1.07042	1.88896
78.496		1.34654	1.40896	1.44516	1.88048	1.41734	1.09954	1.38618	1.02633	1.06434	1.88048
80.475		1.31508	1.41462	1.44011	1.8681	1.3498	1.0279	1.37023	1.02288	1.07124	1.8681
82.476		1.29786	1.43158	1.44616	1.84983	1.38449	1.00608	1.31172	1.02804	1.07637	1.84983
84.484		1.23171	1.44007	1.45173	1.84655	1.3655	1.01997	1.31585	1.02929	1.08639	1.84655
86.458		1.18168	1.43468	1.46371	1.82745	1.37747	1.00611	1.30018	1.02798	1.08019	1.82745
88.509		1.17081	1.41586	1.46658	1.81718	1.35896	1.01059	1.27528	1.02547	1.08401	1.81718
90.503		1.12709	1.40762	1.46355	1.80747	1.34357	1.00254	1.2471	1.02775	1.08318	1.80747
92.487		1.11133	1.41547	1.46209	1.78673	1.30449	1.00936	1.24885	1.02063	1.07173	1.78673
94.526		1.08534	1.42008	1.47749	1.7872	1.29429	1.02141	1.24495	1.02396	1.07054	1.7872
96.534		1.06981	1.43612	1.48114	1.75405	1.2673	1.02144	1.2325	1.02767	1.0724	1.75405
98.534		1.06427	1.44956	1.49887	1.73884	1.31585	1.01997	1.21937	1.02964	1.07491	1.73884
100.533		1.07799	1.44516	1.52392	1.72294	1.26577	1.00611	1.20489	1.02465	1.07512	1.72294
102.577		1.06372	1.44011	1.53403	1.69549	1.26223	1.01059	1.20291	1.02935	1.10282	1.69549
104.621		1.05463	1.44616	1.54782	1.67718	1.26418	1.00254	1.21111	1.0324	1.30189	1.67718
106.633		1.04372	1.45173	1.55085	1.66897	1.2535	1.00936	1.20506	1.03411	1.3	1.66897
108.593		1.04116	1.46371	1.56208	1.66234	1.28238	1.02148	1.19765	1.03585	1.25654	1.66234
110.629		1.03239	1.46658	1.56274	1.65627	1.24965	1.02148	1.19159	1.04438	1.23813	1.65627
112.656		1.03123	1.46355	1.5608	1.64215	1.24861	1.02144	1.18633	1.03924	1.20261	1.64215
114.658		1.02945	1.46209	1.53574	1.62484	1.24556	1.01997	1.18514	1.05153	1.18792	1.62484
116.644		1.02333	1.47749	1.55743	1.62063	1.24544	1.00611	1.18271	1.0472	1.16832	1.62063
118.686		1.01964	1.48114	1.56867	1.60061	1.24995	1.01059	1.18559	1.04563	1.15525	1.60061
120.683		1.01926	1.49887	1.55598	1.58807	1.23237	1.00254	1.18316	1.04101	1.14154	1.58807
122.671		1.00877	1.52392	1.56245	1.5806	1.23249	1.00936	1.1762	1.04175	1.13332	1.5806
124.691		1.00608	1.53403	1.56472	1.56145	1.23133	1.02141	1.16964	1.04671	1.13045	1.56145
126.696		1.01126	1.54782	1.56849	1.5458	1.23456	1.00803	1.1573	1.04623	1.1274	1.5458
128.734		0.999482	1.55085	1.59318	1.53468	1.23982	1.01138	1.15742	1.04087	1.11656	1.53468
130.721		0.99877	1.56208	1.59401	1.5188	1.22748	1.02209	1.15193	1.03913	1.11405	1.5188
132.77		0.998576	1.56274	1.60655	1.50621	1.21405	1.03346	1.15278	1.03859	1.11454	1.50621
134.802		0.992427	1.5608	1.62554	1.48779	1.20372	1.02599	1.14932	1.03973	1.11014	1.48779
136.822		0.985663	1.53574	1.62837	1.48178	1.21405	1.02217	1.13874	1.03622	1.1016	1.48178
138.778		0.990453	1.55743	1.64389	1.4705	1.20372	1.02235	1.17428	1.03959	1.09588	1.4705
140.763		0.993819	1.56867	1.63946	1.46114	1.18534	1.02191	1.1762	1.04694	1.1056	1.46114
142.772		0.985663	1.55598	1.64962	1.45639	1.20372	1.02155	1.16964	1.04038	1.09494	1.45639
144.747		0.983884	1.56245	1.66287	1.44314	1.19532	1.04702	1.1573	1.04375	1.09381	1.44314
146.78		0.981618	1.56472	1.65749	1.43441	1.17563	1.05236	1.15742	1.03759	1.09436	1.43441
148.835		0.974531	1.56849	1.65564	1.41807	1.20395	1.05849	1.15193	1.031	1.09152	1.41807
150.845		0.969773	1.59318	1.65819	1.41554	1.20725	1.05636	1.15278	1.03015	1.09194	1.41554
152.87		0.987702	1.59401	1.66152	1.39819	1.19999	1.0604	1.14932	1.03078	1.09833	1.39819
154.848		0.979062	1.60655	1.65728	1.38721	1.18958	1.04403	1.13874	1.02148	1.09366	1.38721
156.848		0.972524	1.62554	1.64452	1.38952	1.23746	1.04183	1.17428	1.01532	1.09259	1.38952
158.803		0.971748	1.62837	1.63544	1.38373	1.20372	1.01138	1.17428	1.01059	1.08468	1.38373
160.804		0.969741	1.64389	1.63754	1.36726	1.19532	1.02209	1.13874	1.00321	1.08697	1.36726
162.805		0.957605	1.63946	1.62235	1.36207	1.17563	1.03346	1.17428	1.00278	1.07674	1.36207
164.787		0.960129	1.64962	1.62337	1.35477	1.20395	1.02599	1.1762	0.990037	1.06828	1.35477
166.791		0.967411	1.66287	1.61504	1.35641	1.20725	1.02217	1.16964	0.983451	1.07323	1.35641
168.826		0.961133	1.65749	1.61157	1.34255	1.19999	1.02235	1.1573	0.980002	1.06831	1.34255
170.843		0.96	1.65564	1.6087	1.33747	1.18958	1.02191	1.15742	0.980401	1.06962	1.33747
172.833		0.94932	1.65819	1.61173	1.32735	1.23746	1.02155	1.15193	0.977179	1.07775	1.32735
174.876		0.953139	1.66152	1.60397	1.32142	1.20372	1.02191	1.15278	0.973473	1.0771	1.32142
176.899		0.949968	1.65728	1.60729	1.31162	1.20395	1.02191	1.14932	0.973445	1.07713	1.31162
178.947		0.952492	1.64452	1.61121	1.29473	1.20725	1.02599	1.13874	0.978548	1.08132	1.29473
180.923		0.970874	1.63544	1.60215	1.28656	1.19999	1.02217	1.13874	0.976181	1.08202	1.28656
182.917		0.953625	1.63754	1.59596	1.28056	1.18958	1.02191	1.17428	0.971249	1.0804	1.28056
184.969		0.951359	1.62235	1.59163	1.27851	1.20395	1.02191	1.1762	0.970508	1.07961	1.27851
186.959		0.949191	1.62337	1.5958	1.26444	1.20725	1.02191	1.16964	0.977008	1.08669	1.26444
188.933		0.944337	1.61504	1.5833	1.25321	1.20395	1.02191	1.1573	0.975383	1.08874	1.25321
190.951		0.939838	1.61157	1.5896	1.25306	1.20372	1.02599	1.15742	0.982453	1.08901	1.25306
192.989		0.942686	1.6087	1.58851	1.24655	1.19999	1.02217	1.15193	0.979403	1.0888	1.24655
195.003		0.957994	1.61173	1.70063	1.24901	1.18958	1.02235	1.15278	0.977806	1.08761	1.24901
196.974		0.941133	1.60397	1.59163	1.26444	1.20395	1.02191	1.14932	0.976723	1.08807	1.25321
198.985		0.933786	1.60729	1.5958	1.25321	1.20725	1.02191	1.13874	0.975241	1.09045	1.25306
201.024		0.938188	1.61121	1.5833	1.25306	1.19999	1.02599	1.15278	0.982681	1.11983	1.24655
203.024		0.934887	1.60215	1.5896	1.24655	1.18958	1.02217	1.14932	0.999844	1.07961	1.24901
205.002		0.934984	1.59596	1.58851	1.24901	1.23746	1.02235	1.13874	0.985076	1.08669	1.24655
207.024		0.926764	1.59163	1.59163	1.26444	1.18958	1.02191	1.14932	0.981484	1.08874	1.24901
209.075		0.934272	1.5958	1.5958	1.25321	1.33576	1.02191	1.13874	0.978177	1.08901	1.24655
211.034		0.93301	1.5833	1.5833	1.25306	1.57276	1.02191	1.33871	0.978092	1.0888	1.24901
213.019		0.92822	1.5896	1.5896	1.24655	1.6767	1.02599	1.46942	0.974642	1.08761	1.24655
215.028		0.92945	1.58851	1.58851	1.24901	1.71634	1.02217	1.53245	0.966431	1.08807	1.24655
217.023		0.923172	1.70063	1.5833	1.47128	1.72024	1.02235	1.56255	0.985076	1.08761	1.24901
219.049		0.934369	1.97556	1.97556	1.62472	1.69747	1.02191	1.56125	0.981484	2.96497	1.47128
221.092		1.13065	2.34972	2.34972	1.85622	1.688	1.42785	1.57014	0.978177	2.78419	1.62472
223.127		1.2822	2.46293	2.46293	1.81145	1.66992	1.5334	1.56623	1.57787	2.55098	1.85622
225.127		1.33887	2.39815	2.39815	1.72535	1.65319	1.50573	1.5638	1.45556	2.55021	1.81145
227.085		1.35634	2.33471	2.33471	1.64945	1.63756	1.50713	1.55265	1.35555	2.32329	1.72535
229.114		1.35479	2.27011	2.27011	1.60224	1.62113	1.49472	1.54439	1.2747	2.22194	1.64945
231.14		1.34566	2.28131	2.28131	1.54562	1.60354	1.46792	1.5247	1.21147	2.13531	1.60224
233.109		1.34042	2.24825	2.24825	1.49511	1.58718	1.46421	1.51695	1.20673	2.13699	1.54562
235.155		1.32395	2.19008	2.19008	1.45261	1.56012	1.45061	1.50161	1.14618	2.2307	1.49511
237.191		1.32547	2.17076	2.17076	1.42261	1.5531	1.43982	1.48588	1.10633	2.26805	1.45261
239.183		1.32062	2.1085	2.1085	1.39874	1.51963	1.42961	1.4581	1.08603	2.2319	1.42261
241.148		1.31864	2.07489	2.07489	1.37903	1.51389	1.42904	1.44565	1.06077	2.09659	1.39874
243.16		1.31835	2.03861	2.03861	1.36595	1.50889	1.41724	1.44186	1.03736	1.96506	1.37903
245.129		1.32052	1.99149	1.99149	1.34344	1.49172	1.41738	1.43139	1.02376	1.92652	1.36595
247.118		1.31188	1.98603	1.98603	1.33344	1.47799	1.40544	1.41793	1.01076	1.89886	2.40785
249.125		1.32395	1.97679	2.90386	1.32431	1.46858	1.39347	1.40678	1.01076	1.94445	3.34255
251.084		1.32547	1.96411	2.84049	1.30337	1.45771	1.37868	1.38833	2.01326	1.9352	3.37111
253.055		1.32062	1.94952	2.84814	1.2939	1.45038	1.35595	1.379	2.27298	2.09671	3.28554
255.118		1.31864	2.64612	2.83034	1.27484	1.44092	1.35501	1.37028	2.31232	2.10874	3.24089
257.161		1.55537	2.80362	2.80364	3.34255	1.61301	1.42326	1.58298	2.30858	3.17885	3.20513
259.135		1.56913	2.98487	2.75914	3.37111	1.66027	1.42399	1.65818	2.29764	3.14669	3.17094
261.148		1.54502	2.90386	2.75024	3.28554	1.65502	1.40829	1.67074	2.29738	3.10929	3.15385
263.206		1.52929	2.84049	2.71285	3.24089	1.64684	1.3943	1.66565	2.29074	3.07252	3.13675

## Sheet: Fig 4 - D
	Bilirubin	Vehicle
	51.4	0

## Sheet: Fig 4 - F
0.636	1	1	1	1	1	1	1	1	1	1	1	1	1	1	1	1	1	1	1	1	1	1	1	1	1	1	1	1	1	1	1	1	1	1
1.93	1.03523	1.0518	1.12401	1.00232	0.950133	0.990179	0.995469	0.964007	0.948003	0.957447	0.988634	0.997382	0.998364	0.994747	0.997268	1.0014	0.988076	0.997847	0.99352	0.994498	1.00308	0.995057	0.995924	0.999528	0.99398	0.995555	0.995861	1.00196	1.00237	1.00125	1.0198	1.00554	1.00264	1.04381
3.244	0.97539	0.963981	0.965584	0.965318	0.922589	0.973547	0.97649	0.955183	0.927723	0.94964	0.976154	0.963706	0.960634	0.957204	0.961433	0.965212	0.945843	0.963375	0.952387	0.954892	0.966388	0.951985	0.956071	0.960398	0.952638	0.963792	0.960273	0.961651	0.968593	0.9643	0.974479	0.957156	0.954187	0.979476
4.568	0.976806	0.962111	0.966545	0.960205	0.912705	0.960477	0.960532	0.92727	0.912711	0.921819	0.950863	0.962442	0.960568	0.952359	0.957195	0.964408	0.939506	0.957176	0.950945	0.957956	0.968645	0.946048	0.967558	0.954731	0.943977	0.962066	0.958382	0.963331	0.964717	0.960752	0.975083	0.954842	0.940832	0.987084
5.878	0.969343	0.950877	0.962674	0.952892	0.913885	0.955291	0.959066	0.946476	0.939114	0.967247	0.995492	0.954368	0.959196	0.949685	0.955286	0.962035	0.932651	0.954218	0.945939	0.953197	0.959472	0.949294	1.00311	0.952627	0.937895	0.95552	0.955947	0.956774	0.958677	0.961702	0.979102	0.946038	0.926123	0.945315
7.21	0.969802	0.944187	0.961009	0.951568	0.914334	0.963115	0.957249	0.927514	0.921157	0.919825	0.950167	0.956793	0.960733	0.947137	0.954515	0.959079	0.925476	0.952674	0.947883	0.950132	0.960036	0.941635	1.0273	0.951439	0.928951	0.951838	0.952313	0.951756	0.959167	0.958258	0.980311	0.944531	0.916514	0.932429
8.532	0.979236	0.941803	0.969337	0.961347	0.909167	0.967869	0.958475	0.931002	0.936029	0.917314	0.957791	0.955294	0.96427	0.953413	0.962169	0.959412	0.928314	0.959003	0.950394	0.951131	0.961859	0.942993	1.04612	0.956878	0.939185	0.953665	0.956865	0.954629	0.959347	0.964389	0.978322	0.952621	0.913918	0.931692
9.869	0.969764	0.92974	0.962487	0.951204	0.900295	0.956364	0.950682	0.922713	0.928428	0.902102	0.946216	0.94684	0.952553	0.948883	0.95681	0.95203	0.91971	0.952739	0.944951	0.943841	0.956115	0.932941	1.05244	0.954445	0.931126	0.951579	0.949972	0.9453	0.963287	0.958986	0.97378	0.944981	0.90226	0.922566
11.186	0.980595	0.927896	0.962346	0.954927	0.902148	0.982593	0.951754	0.925968	0.926839	0.905222	0.950324	0.953588	0.956337	0.95486	0.958508	0.957719	0.924119	0.955523	0.948483	0.942262	0.963205	0.931542	1.06007	0.954516	0.932453	0.968079	0.953531	0.944592	0.980362	0.961405	0.979559	0.946131	0.901543	0.917439
12.493	0.985131	0.924722	0.958897	0.951287	0.89364	0.957884	0.951536	0.921981	0.923387	0.896769	0.946964	0.952566	0.957692	0.95637	0.948438	0.954916	0.925511	0.956002	0.946182	0.933579	0.960369	0.923659	1.05446	0.952455	0.929639	0.965418	0.954055	0.941151	0.978959	0.961242	0.98183	0.959416	0.893289	0.956231
13.828	0.970567	0.920007	0.956317	0.950459	0.903271	0.965529	0.948996	0.916354	0.935126	0.891215	0.944145	0.951923	0.958419	0.953114	0.951485	0.950892	0.92087	0.955806	0.948612	0.921113	0.962351	0.923171	1.05561	0.949364	0.920204	0.961217	0.951508	0.939189	0.969391	0.956566	0.981064	0.935304	0.887596	0.903771
15.144	0.97893	0.922128	0.96488	0.957194	0.891731	0.963458	0.952761	0.919411	0.929256	0.888885	0.946251	0.958644	0.956172	0.958084	0.950277	0.952668	0.928635	0.962352	0.959126	0.923759	0.970584	0.926656	1.06313	0.952512	0.923521	0.965202	0.954898	0.936052	0.966455	0.956774	0.984249	0.94116	0.891877	0.904418
16.475	0.964233	0.894445	0.963683	0.938744	0.874463	0.943964	0.934199	0.898241	0.907302	0.865711	0.926164	0.932882	0.93158	0.933281	0.930433	0.932492	0.902021	0.937993	0.939087	0.904142	0.944973	0.902769	1.03461	0.926178	0.902009	0.949363	0.930624	0.917232	0.934339	0.935176	0.977946	0.921	0.871395	0.890299
17.794	0.963659	0.902821	0.957208	0.9425	0.876962	0.954754	0.938183	0.902822	0.913962	0.870657	0.931369	0.941722	0.93558	0.938896	0.941695	0.94111	0.906305	0.946802	0.95054	0.907787	0.953264	0.908126	1.03711	0.930901	0.908324	0.952456	0.932497	0.918203	0.925081	0.936141	0.967732	0.919189	0.871031	0.884089
19.116	0.955909	0.903888	0.956974	0.937851	0.869606	0.94839	0.931659	0.896834	0.902853	0.863989	0.926408	0.935168	0.932655	0.935294	0.937053	0.945259	0.903074	0.942452	0.94743	0.897363	0.956592	0.905774	1.05715	0.928697	0.905314	0.945523	0.933452	0.92225	0.915011	0.93718	0.963915	0.917352	0.85483	0.877218
20.436	0.963984	0.907588	0.957443	0.937205	0.869409	0.951759	0.937592	0.904217	0.901103	0.866138	0.92754	0.941198	0.934109	0.939085	0.936966	0.95432	0.906073	0.943931	0.956567	0.895645	0.961396	0.915768	1.07006	0.930944	0.910461	0.951622	0.934426	0.917818	0.908817	0.937581	0.973592	0.935872	0.849889	0.887668
21.756	0.968405	0.922036	0.969126	0.942897	0.865787	0.958376	0.940525	0.901438	0.900718	0.87243	0.936312	0.948284	0.938604	0.944574	0.941887	0.965157	0.910571	0.948824	0.969009	0.901867	0.96769	0.919163	1.0796	0.934751	0.920143	0.958153	0.939539	0.919579	0.908778	0.941514	0.984088	0.940764	0.856652	0.89905
23.068	0.966032	0.922431	0.968751	0.939439	0.865113	0.952399	0.940569	0.899904	0.896776	0.874307	0.940368	0.95039	0.936489	0.944936	0.939418	0.972095	0.910339	0.947955	0.967842	0.901356	0.965274	0.910461	1.08226	0.935495	0.922784	0.962756	0.93791	0.917677	0.901001	0.942761	0.986386	0.973363	0.845825	0.906944
24.396	0.964845	0.919362	0.957067	0.952759	0.893191	0.954411	0.936935	0.895869	0.88183	0.869479	0.930377	0.951696	0.935249	0.941066	0.941502	0.957317	0.905144	0.943692	0.958689	0.899243	0.963089	0.902669	1.08103	0.930558	0.916272	0.95191	0.931954	0.92049	0.89263	0.935844	1.00009	0.930624	0.836147	0.880285
25.716	0.978548	0.923339	0.959155	0.931447	0.857869	0.961028	0.937876	0.899648	0.876967	0.855277	0.928653	0.952269	0.938571	0.941648	0.944199	0.948311	0.902717	0.943322	0.957733	0.900172	0.961251	0.900459	1.08744	0.931345	0.91357	0.956556	0.929369	0.917353	0.893467	0.941767	0.992178	0.933162	0.84069	0.884074
27.033	0.954741	0.915885	0.948059	0.921767	0.849361	0.941967	0.936388	0.889882	0.86361	0.847432	0.923606	0.942551	0.928655	0.9528	0.931974	0.924985	0.892596	0.932339	0.945178	0.888471	0.947216	0.885348	1.08371	0.934765	0.910351	0.948054	0.919648	0.90857	0.886115	0.921712	0.984141	0.922137	0.825377	0.877684
28.346	0.957344	0.903651	0.962416	0.919368	0.877074	0.916841	0.950638	0.875478	0.842155	0.84145	0.907801	0.911472	0.907303	0.917222	0.914635	0.892834	0.87496	0.916288	0.92807	0.872475	0.927769	0.862802	1.05609	0.906785	0.878285	0.909171	0.898651	0.885541	0.86273	0.899431	0.966966	0.894852	0.801457	0.86973
29.673	0.937633	0.859269	0.918944	0.888757	0.842622	0.910104	0.90804	0.849867	0.831516	0.812672	0.893946	0.881304	0.887934	0.906228	0.900501	0.892321	0.856378	0.905413	0.905082	0.85764	0.912157	0.846126	1.02661	0.911422	0.857166	0.895217	0.902323	0.88548	0.853703	0.900144	0.952734	0.894231	0.791279	0.876872
31.017	0.925787	0.843729	0.91071	0.870621	0.812551	0.883949	0.902152	0.843601	0.816561	0.804723	0.884443	0.866303	0.874515	0.901824	0.885176	0.858144	0.843936	0.90239	0.894001	0.836467	0.900365	0.847848	1.01224	0.901891	0.841833	0.8784	0.89277	0.875766	0.84389	0.88723	0.938878	0.888322	0.774862	0.869204
32.325	0.920984	0.836775	0.916692	0.865277	0.805447	0.876498	0.898518	0.836962	0.807493	0.795583	0.884199	0.850894	0.871722	0.900519	0.875595	0.838814	0.840027	0.899889	0.88501	0.830896	0.905154	0.846921	0.988973	0.916403	0.926887	0.871625	0.890298	0.869614	0.833975	0.889946	0.929134	0.882082	0.76679	0.8677
33.644	0.923739	0.832613	0.916903	0.867825	0.806374	0.870492	0.897511	0.834614	0.803984	0.791039	0.885348	0.842254	0.874151	0.89794	0.869641	0.833181	0.839295	0.899759	0.877801	0.830942	0.89941	0.848891	0.972348	0.926235	0.888728	0.880903	0.892152	0.86581	0.837091	0.893004	0.924524	0.882043	0.763841	0.862362
34.973	0.923357	0.830559	0.918287	0.863225	0.80087	0.865156	0.894512	0.83058	0.794136	0.78709	0.885974	0.828075	0.881637	0.898254	0.866208	0.826201	0.833476	0.900085	0.870251	0.825672	0.895199	0.842781	0.953338	0.920668	0.867854	0.877681	0.886102	0.868056	0.835353	0.886636	0.914498	0.880324	0.764946	0.85298
36.252	0.92328	0.832008	0.924012	0.865459	0.805363	0.868629	0.895453	0.833219	0.791719	0.789343	0.88768	0.814739	0.886083	0.900299	0.866138	0.824355	0.833119	0.906131	0.869344	0.83013	0.895358	0.841961	0.941109	0.919337	0.868186	0.877451	0.889923	0.868906	0.835585	0.889827	0.916272	0.882109	0.769488	0.854363
37.548	0.923778	0.82915	0.91871	0.86569	0.799214	0.867586	0.893352	0.829952	0.781617	0.787996	0.885766	0.791774	0.88291	0.903067	0.867679	0.822607	0.831423	0.904304	0.865488	0.831778	0.891206	0.837879	0.92347	0.919552	0.856699	0.876386	0.886702	0.868218	0.831013	0.888862	0.916299	0.878354	0.771913	0.851612
38.814	0.925347	0.826792	0.92312	0.867693	0.804099	0.871729	0.897599	0.829615	0.779933	0.787259	0.885591	0.780206	0.879175	0.903429	0.869185	0.822579	0.834904	0.910568	0.86787	0.830292	0.894042	0.832928	0.92053	0.918707	0.852645	0.876343	0.890597	0.867813	0.825193	0.889441	0.91896	0.881792	0.775249	0.85507
40.416	0.924237	0.823408	0.92495	0.866567	0.801881	0.869106	0.896898	0.826906	0.769586	0.789265	0.882998	0.766441	0.872564	0.90593	0.86535	0.819013	0.827657	0.905914	0.864403	0.825115	0.890222	0.83431	0.910546	0.910406	0.853443	0.879681	0.89204	0.869574	0.817054	0.888996	0.917401	0.882836	0.778892	0.850619
41.679	0.927299	0.821867	0.926522	0.867477	0.799747	0.871744	0.901232	0.829894	0.763641	0.790391	0.886027	0.755149	0.868912	0.908478	0.867889	0.821539	0.827157	0.909219	0.863318	0.829015	0.890497	0.832149	0.90801	0.911208	0.851244	0.888643	0.895598	0.868178	0.812882	0.889827	0.919323	0.8847	0.783788	0.850559
42.953	0.927088	0.811937	0.920235	0.858244	0.79416	0.871058	0.894906	0.828859	0.756389	0.78533	0.881431	0.741495	0.864516	0.905961	0.854823	0.818514	0.824498	0.904652	0.861017	0.830037	0.88685	0.831056	0.905474	0.906184	0.845556	0.883608	0.889605	0.864454	0.80929	0.886027	0.91212	0.883708	0.785268	0.848951
44.203	0.926323	0.813978	0.916387	0.85707	0.798119	0.877705	0.897577	0.83244	0.752241	0.787984	0.885766	0.733504	0.861029	0.909075	0.849919	0.818874	0.827925	0.909524	0.863399	0.830733	0.887371	0.829326	0.914143	0.911437	0.844597	0.887578	0.893894	0.868036	0.801782	0.889709	0.912859	0.88819	0.790596	0.849387
45.522	0.930705	0.814373	0.911625	0.858178	0.795873	0.881952	0.900554	0.832568	0.748939	0.788566	0.887315	0.727329	0.86017	0.910271	0.848221	0.821761	0.832851	0.912438	0.862297	0.830362	0.890149	0.833607	0.912246	0.907186	0.842324	0.886269	0.894006	0.86836	0.802645	0.89526	0.912388	0.8893	0.79992	0.851131
46.784	0.933384	0.814703	0.918874	0.858311	0.798652	0.88769	0.901495	0.836753	0.746428	0.792036	0.886061	0.723821	0.862913	0.91079	0.84759	0.828615	0.83012	0.916179	0.862329	0.834192	0.891263	0.832373	0.915637	0.916575	0.838823	0.881177	0.89455	0.873196	0.801782	0.896967	0.921339	0.892962	0.805066	0.851567
48.06	0.933958	0.818733	0.920727	0.860511	0.79986	0.8931	0.903181	0.837834	0.75051	0.795699	0.889891	0.724318	0.868334	0.914785	0.843772	0.833999	0.832726	0.916092	0.864387	0.835098	0.896429	0.83898	0.91543	0.927796	0.836304	0.882961	0.895898	0.877385	0.803031	0.899476	0.928032	0.892671	0.817328	0.854724
49.333	0.934475	0.822868	0.923425	0.865939	0.804773	0.89997	0.904166	0.839078	0.74718	0.794275	0.890622	0.721597	0.87306	0.915587	0.845909	0.838773	0.835422	0.914613	0.8697	0.835098	0.89381	0.837523	0.920549	0.932647	0.84042	0.88345	0.896816	0.879045	0.803147	0.901807	0.92654	0.895064	0.827552	0.851822
50.839	0.932026	0.814742	0.921196	0.867825	0.805784	0.906468	0.904385	0.837021	0.740822	0.797007	0.890413	0.714241	0.882927	0.920352	0.838272	0.837774	0.841598	0.917767	0.869555	0.834308	0.893882	0.832414	0.916238	0.935281	0.84074	0.887852	0.895786	0.877304	0.797726	0.903766	0.926648	0.895487	0.827233	0.849131
52.556	0.944101	0.825331	0.929056	0.874427	0.81213	0.921013	0.908631	0.84095	0.740427	0.808594	0.898507	0.714386	0.897652	0.923734	0.843439	0.843144	0.846043	0.923182	0.872519	0.837721	0.901291	0.84182	0.918379	0.937513	0.853554	0.900482	0.902079	0.879328	0.810603	0.908575	0.930048	0.905322	0.836102	0.856679
54.074	0.941039	0.828834	0.929337	0.867709	0.812747	0.926855	0.903728	0.83709	0.735902	0.80458	0.896627	0.708889	0.888711	0.921642	0.842178	0.8451	0.837118	0.919768	0.870818	0.843386	0.897037	0.840926	0.911617	0.935796	0.851035	0.901374	0.900712	0.878256	0.807989	0.905013	0.930303	0.906274	0.842386	0.855807
55.349	0.941613	0.833035	0.931871	0.86708	0.811315	0.928823	0.902239	0.835323	0.73562	0.801396	0.900265	0.703419	0.885372	0.922193	0.846557	0.846127	0.831173	0.916114	0.872876	0.844872	0.89844	0.836057	0.916219	0.932061	0.847878	0.897533	0.894868	0.87437	0.805581	0.912138	0.925304	0.907107	0.846826	0.856919
56.64	0.947412	0.836024	0.933091	0.864631	0.808171	0.935082	0.903224	0.841252	0.737944	0.796839	0.902771	0.705263	0.88957	0.925857	0.852564	0.847848	0.831727	0.920333	0.875452	0.844454	0.901855	0.836173	0.926532	0.930601	0.848541	0.896066	0.901817	0.87696	0.809818	0.910639	0.928986	0.904727	0.859475	0.857822
57.953	0.949746	0.841055	0.939449	0.86205	0.811568	0.941595	0.906683	0.842868	0.737925	0.802988	0.899916	0.705636	0.887967	0.928043	0.858064	0.85122	0.833119	0.921899	0.877817	0.844872	0.906239	0.834666	0.926015	0.933706	0.851625	0.905056	0.904083	0.877446	0.822527	0.914157	0.929403	0.906036	0.869722	0.873489
59.275	0.954607	0.852473	0.942147	0.86397	0.818812	0.949344	0.910404	0.844752	0.738536	0.804295	0.904686	0.706582	0.889405	0.930796	0.860095	0.855688	0.835904	0.92651	0.878821	0.844407	0.909639	0.84004	0.931735	0.932189	0.854635	0.909789	0.908578	0.882546	0.825785	0.917512	0.934026	0.908336	0.880936	0.875128
60.597	0.95654	0.8557	0.94712	0.865558	0.823951	0.957645	0.911761	0.840927	0.738122	0.804969	0.910116	0.706713	0.894677	0.931975	0.860095	0.85541	0.8351	0.931142	0.88339	0.846613	0.910464	0.842483	0.933445	0.935181	0.858357	0.911185	0.9059	0.879389	0.836319	0.924726	0.932373	0.901885	0.888803	0.881608
61.917	0.959832	0.857991	0.942475	0.863093	0.817296	0.961967	0.906902	0.837358	0.735761	0.802405	0.912327	0.702542	0.897007	0.925999	0.860025	0.855674	0.830656	0.927141	0.88535	0.848702	0.912374	0.842193	0.929819	0.93405	0.856883	0.908581	0.902866	0.874957	0.839796	0.925216	0.934805	0.897549	0.894154	0.88236
63.237	0.963946	0.858373	0.942358	0.867329	0.82162	0.973279	0.91406	0.837555	0.736984	0.802833	0.911805	0.704213	0.899304	0.927729	0.863581	0.854828	0.833583	0.929555	0.892462	0.849584	0.918856	0.844097	0.936093	0.938215	0.862277	0.912033	0.905263	0.883214	0.834464	0.92719	0.939926	0.898646	0.909182	0.888254
64.561	0.969974	0.861218	0.951601	0.873964	0.821227	0.981461	0.916862	0.843217	0.743465	0.804749	0.911996	0.70663	0.909435	0.934209	0.862302	0.858366	0.838778	0.936775	0.898359	0.853856	0.918668	0.845513	0.944359	0.941707	0.861687	0.92498	0.907211	0.884812	0.832031	0.93292	0.943783	0.899439	0.919041	0.889938
65.88	0.965707	0.865419	0.952563	0.870108	0.81884	0.985022	0.912878	0.839078	0.745817	0.799816	0.914607	0.705339	0.90879	0.928688	0.860901	0.858102	0.834511	0.932339	0.892203	0.853949	0.917844	0.840562	0.943908	0.942609	0.864267	0.928217	0.907005	0.884792	0.822527	0.933246	0.943313	0.899995	0.918085	0.883458
67.187	0.966089	0.866222	0.955355	0.869066	0.816004	0.991565	0.917562	0.839229	0.747632	0.800114	0.921378	0.704006	0.905436	0.928987	0.861672	0.860447	0.839063	0.93273	0.894293	0.858221	0.914299	0.839734	0.942415	0.947145	0.858984	0.936115	0.90914	0.882748	0.816771	0.931569	0.944374	0.90018	0.918529	0.886059
68.639	0.970166	0.868027	0.959296	0.869761	0.817296	1.00012	0.921568	0.844066	0.75432	0.806367	0.921395	0.708032	0.912261	0.933139	0.863335	0.864402	0.841634	0.936971	0.899558	0.862678	0.919102	0.847302	0.950999	0.958237	0.86294	0.942574	0.914497	0.886269	0.81211	0.936438	0.948339	0.903286	0.922241	0.894193
69.96	0.97185	0.872926	0.959531	0.871895	0.81578	1.0082	0.919226	0.846891	0.757283	0.804774	0.922718	0.708129	0.914327	0.939258	0.867013	0.867358	0.846185	0.93658	0.90296	0.869016	0.921837	0.845861	0.957339	0.96037	0.866699	0.946227	0.917176	0.887605	0.811105	0.939362	0.95311	0.908508	0.928445	0.897501
71.524	0.975639	0.877917	0.956223	0.871647	0.814207	1.01061	0.919292	0.844903	0.753784	0.80269	0.917392	0.707632	0.913186	0.936033	0.869623	0.871451	0.848185	0.933818	0.904337	0.870943	0.924572	0.848138	0.951948	0.959411	0.866675	0.940387	0.918075	0.88714	0.808131	0.93813	0.952908	0.905335	0.935276	0.90141
72.822	0.977514	0.882882	0.954182	0.871134	0.819655	1.01416	0.919861	0.845635	0.753774	0.803182	0.912501	0.703868	0.915368	0.937528	0.870429	0.876238	0.850951	0.939146	0.907626	0.875958	0.926134	0.850771	0.953216	0.958309	0.874796	0.937999	0.920154	0.886674	0.805491	0.937759	0.948742	0.905639	0.945978	0.902824
74.116	0.978528	0.87477	0.949607	0.868636	0.810501	1.01608	0.918525	0.844391	0.748911	0.801098	0.912222	0.699489	0.916541	0.935829	0.867714	0.87739	0.85229	0.934231	0.906232	0.87352	0.922112	0.845198	0.953263	0.954373	0.870864	0.933137	0.921558	0.882445	0.800391	0.936497	0.946968	0.902652	0.952456	0.900734
75.598	0.980748	0.870318	0.950827	0.867875	0.81519	1.02541	0.918876	0.850251	0.749664	0.806017	0.915721	0.698798	0.917235	0.937119	0.86845	0.882039	0.853004	0.934361	0.909456	0.88016	0.924601	0.843634	0.955733	0.954931	0.870778	0.935424	0.925979	0.883436	0.800173	0.934775	0.953016	0.906076	0.959071	0.905575
76.925	0.979677	0.872201	0.95078	0.866766	0.815948	1.02817	0.917278	0.850018	0.74861	0.807299	0.918193	0.696464	0.918326	0.93833	0.864439	0.8853	0.850594	0.934187	0.908986	0.883456	0.92256	0.845704	0.960298	0.951554	0.861527	0.939797	0.926484	0.877466	0.80213	0.936245	0.953661	0.908468	0.960084	0.898403
78.244	0.979141	0.869554	0.94827	0.870009	0.819935	1.03021	0.917956	0.849727	0.74623	0.808568	0.916626	0.695013	0.918971	0.938204	0.864929	0.889435	0.847649	0.934231	0.913425	0.883851	0.925469	0.847252	0.954118	0.949178	0.853394	0.944127	0.927084	0.880745	0.803572	0.935517	0.94592	0.909288	0.958661	0.897561
79.552	0.990642	0.882382	0.956481	0.875933	0.833188	1.04607	0.923757	0.855808	0.751799	0.815766	0.921552	0.700338	0.930308	0.946209	0.873196	0.899675	0.855771	0.945192	0.918204	0.893486	0.937218	0.855192	0.962796	0.958166	0.860065	0.951305	0.938827	0.890458	0.812547	0.947437	0.955919	0.920353	0.964661	0.902974
80.852	0.990432	0.878931	0.955824	0.872144	0.825663	1.04373	0.923779	0.853389	0.747707	0.814562	0.915181	0.696692	0.930143	0.947704	0.869395	0.893542	0.851219	0.942104	0.915823	0.888076	0.93415	0.857693	0.958241	0.95954	0.857141	0.945551	0.935175	0.888232	0.808839	0.946725	0.950019	0.91681	0.958843	0.898193
82.171	0.992077	0.876086	0.951859	0.873054	0.831195	1.04949	0.923254	0.852587	0.745459	0.813099	0.919341	0.698584	0.934092	0.952202	0.870411	0.898759	0.857467	0.943409	0.915709	0.885012	0.938202	0.861957	0.963811	0.96369	0.855691	0.951622	0.932871	0.890883	0.810217	0.950139	0.951551	0.925032	0.963238	0.901606
83.421	0.993914	0.880182	0.953337	0.872756	0.830268	1.0565	0.925705	0.855854	0.747096	0.815092	0.917427	0.7002	0.932473	0.951997	0.877329	0.900494	0.853201	0.942626	0.920148	0.885476	0.937536	0.85963	0.965379	0.969687	0.853148	0.954341	0.929856	0.890216	0.814144	0.950213	0.956819	0.929937	0.96391	0.903696
84.734	1.00103	0.882303	0.958804	0.874493	0.827123	1.06541	0.929733	0.860946	0.753454	0.818562	0.920786	0.705304	0.940868	0.960428	0.88134	0.902464	0.853201	0.949129	0.928573	0.88478	0.944785	0.866097	0.972367	0.977287	0.855962	0.964137	0.935007	0.892927	0.823699	0.959223	0.964883	0.935423	0.9746	0.909274
86.216	1.0031	0.887268	0.962628	0.879788	0.823501	1.0713	0.930696	0.860376	0.754583	0.814665	0.91593	0.706589	0.939315	0.961372	0.882654	0.902686	0.849773	0.948107	0.92739	0.884246	0.947867	0.858877	0.974772	0.97587	0.857596	0.966151	0.935812	0.897825	0.825038	0.962385	0.959722	0.934815	0.98159	0.910597
87.552	1.007	0.881736	0.962792	0.874096	0.823614	1.06945	0.930324	0.858528	0.754734	0.813487	0.91633	0.707197	0.941133	0.963668	0.883022	0.905795	0.847506	0.945867	0.927779	0.877443	0.945422	0.856774	0.977787	0.976371	0.85106	0.964943	0.938884	0.899889	0.826313	0.962445	0.957988	0.933929	0.980099	0.913244
88.87	1.00373	0.883896	0.96251	0.87638	0.818981	1.07337	0.932798	0.855203	0.754969	0.813876	0.912135	0.706872	0.942339	0.961765	0.885719	0.906683	0.846168	0.946693	0.930905	0.883549	0.948475	0.85554	0.977646	0.976757	0.849118	0.968194	0.936224	0.897744	0.827524	0.96286	0.963485	0.940446	0.981886	0.91789
90.195	1.61657	1.35341	1.42686	1.18886	1.73713	1.19937	1.36077	1.49267	0.657097	0.794871	1.2285	1.22859	1.52695	1.49014	1.81484	1.29752	1.32903	1.88947	2.01926	2.09268	2.27149	1.4748	1.60451	1.30493	1.49735	0.794864	1.05014	0.818638	0.771495	1.0072	0.948057	0.975531	0.867251	0.851717
91.528	3.20591	1.9959	2.15756	1.74177	2.23254	1.38268	2.19254	2.74313	1.27953	1.9953	2.47053	1.90476	2.72217	2.99613	2.56547	1.83898	1.87551	1.98793	3.37144	2.45522	3.10761	1.78211	2.61124	2.52405	2.08362	1.96546	2.27256	2.58055	1.9465	1.88453	1.87917	1.77963	1.20252	1.38864
92.835	3.6336	2.40106	2.34545	1.78686	2.28946	1.4355	2.5798	3.02637	1.52405	2.0356	3.08719	2.19708	2.96911	3.47664	2.76433	2.14	2.18816	2.01475	3.68383	2.38327	3.39358	1.84589	2.96236	2.99375	2.23843	2.43911	2.9682	2.61232	2.2664	2.54588	2.92438	2.03811	1.40578	2.08951
94.166	3.86863	2.75146	2.35388	1.8292	2.22569	1.49888	2.79332	3.13634	1.52096	2.01629	3.31545	2.30577	3.02367	3.6978	2.89859	2.31386	2.31033	2.16619	3.85669	2.44217	3.60839	1.98083	3.16494	3.18692	2.33814	2.59545	3.21371	2.58045	2.30292	2.88229	3.48186	2.08579	1.51322	2.56312
95.487	4.03862	2.92381	2.39172	1.87724	2.20581	1.55262	2.97152	3.21389	1.5735	2.01516	3.4828	2.3517	3.10661	3.8305	2.98735	2.41824	2.35759	2.26477	3.96097	2.48461	3.72848	2.07795	3.26836	3.30604	2.41652	2.62228	3.30009	2.51422	2.34216	3.073	3.69675	2.1229	1.58125	2.86355
96.814	4.10525	2.96875	2.39664	1.90117	2.21539	1.56815	3.04989	3.22628	1.59743	2.00942	3.55142	2.36063	3.12474	3.87894	3.01816	2.45346	2.35681	2.28339	3.98928	2.48017	3.76288	2.11022	3.29359	3.3431	2.44929	2.62159	3.34544	2.50468	2.34788	3.14412	3.70412	2.13996	1.60005	3.04357
98.141	4.17472	3.00691	2.41701	1.92571	2.23049	1.58802	3.11893	3.25011	1.62485	2.00089	3.62492	2.37675	3.16437	3.94416	3.0524	2.49034	2.37526	2.29711	4.03284	2.48138	3.80367	2.15099	3.32159	3.39317	2.49021	2.6393	3.41689	2.53008	2.36446	3.212	3.74077	2.17081	1.63023	3.19996
99.457	4.26131	3.0486	2.44945	1.95749	2.26068	1.60614	3.19394	3.28505	1.65814	2.02969	3.69242	2.39942	3.22124	4.03196	3.10076	2.53107	2.40461	2.32343	4.08559	2.50947	3.85139	2.1828	3.35919	3.44857	2.52029	2.66534	3.49324	2.58092	2.39441	3.27297	3.80769	2.21088	1.66602	3.33008

## Sheet: Fig 4 - G
veh	rr
3.94	0.73
