# Supplementary material for: Identification of a bilirubin receptor that may mediate a component of cholestatic itch
Source: eLife. 2019 Jan 21;8:e44116. doi: 10.7554/eLife.44116 (PMC6368403; doi:10.7554/eLife.44116)
Supplement: Figure 6—source data 1. [file elife-44116-fig6-data1.xlsx]

## Sheet: Fig 6 - A
[Ligand] (M)	bilirubin			200 μM bilirubin + QWF
-3	92.1113	105.486	102.402
-3.30103	69.422	70.1483	63.5847
-3.60206	71.8089	75.8019	75.1545
-3.90309	61.2591	54.8317	55.4389
-4.20412	49.8998	18.4414	32.057
-4.50515	6.41821	7.05096	1.24513
-4.80618	27.9538	0	0
-5.10721	34.8054	0	0
-5.40824
-4.30103				28.3565	33.3296	29.6608
-4.60206				25.9258	20.3235	24.3753
-4.90309				-110.932	35.7498	32.2708
-5.20412				40.3878	15.8837	33.1247
-5.50515				39.6923	42.4463	40.5806
-5.80618				92.0026	70.6634	81.1883
-6.10721				96.6576	83.0687	96.8192
-6.40824				115.362	88.3892	96.2484

## Sheet: Fig 6 - B
Vehicle	100μM QWF
53	20
20	25
42	12
31	33
23	15
22	5
48	41
	3

## Sheet: Fig 6 - C
Vehicle	500μM QWF
226	131
123	134
200	107
147	144
	190
	306
	118

## Sheet: Fig 6 - D
vehicle	QWF
40	13
21	17
28	17
70	20
25	9
18	37
27	7
33	16
	12
