# Supplementary material for: Identification of a bilirubin receptor that may mediate a component of cholestatic itch
Source: eLife journal article supplement (doi:10.7554/elife.44116), 2019-01-18
Supplement: supp [file elife-44116-supp-v1.zip]

A

WT<sup>55</sup> GCAGGGTTTCTAGCCCTAAACACATCGGCCTCGCCAACAGCACCCAC  
 A1 GCAGGGTTTCTAGCCCTAAA--CATCGGCCTCGCCAACAGCACCCAC  
 \*\*\*\*\*

101

B

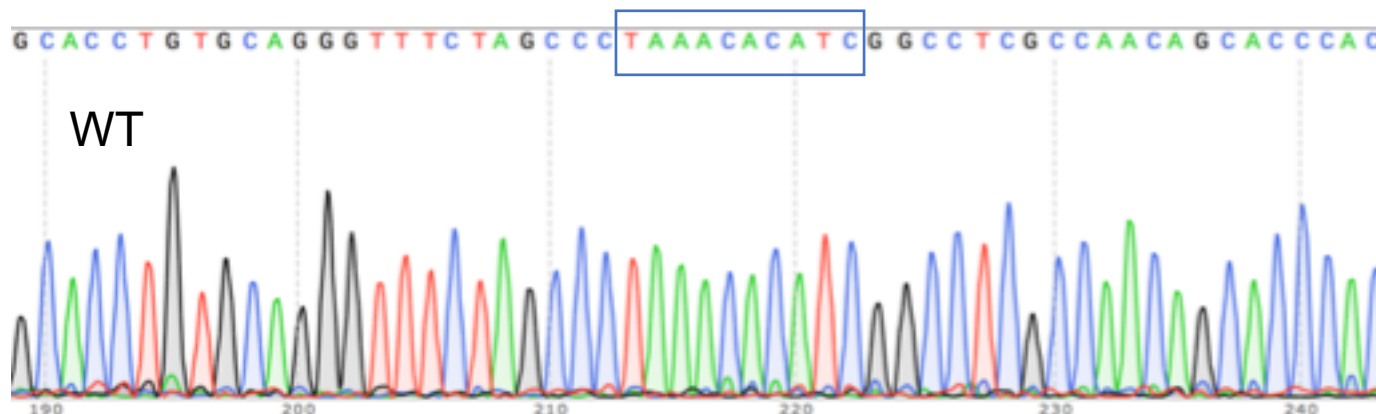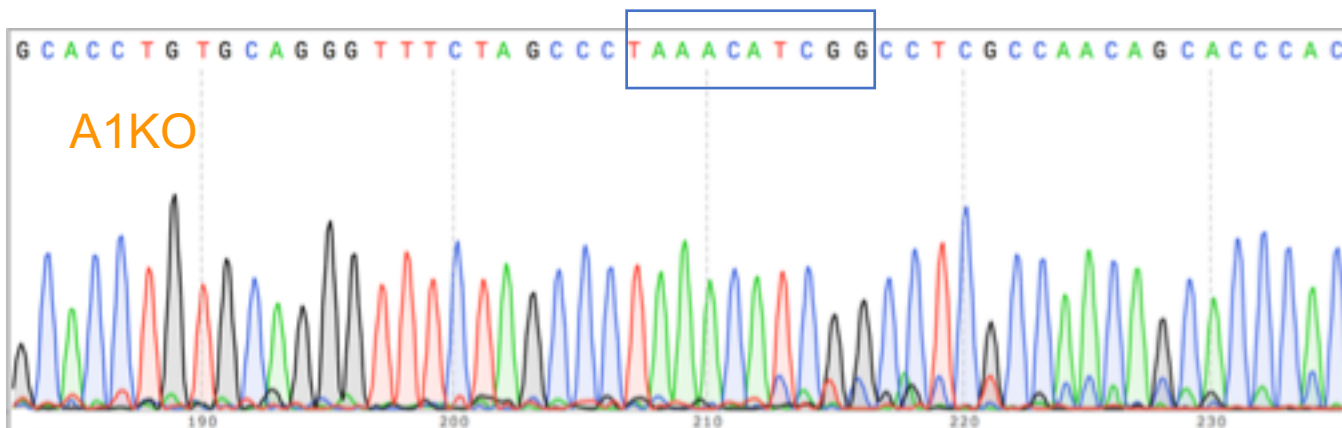

C

A1 KO

atgggggaaagcagcacctgtgcagggtttctagccctaaacatcggcctcgccaacagcacccacaacaactaa  
 taccacctttcgtcgtggacacgtcccaaagatcgggatttgtagccggagcggttgtcgtgggtgtttgttgatt  
 Met Gly Glu Ser Ser Thr Cys Ala Gly Phe Leu Ala Leu Asn Ile Gly Leu Ala Asn Ser Thr His Asn Asn \*
