# Supplementary material for: Identification of a bilirubin receptor that may mediate a component of cholestatic itch
Source: eLife journal article supplement (doi:10.7554/elife.44116), 2019-01-18
Supplement: supp [file elife_poa_e44116_Figure_1_source_data_1.xlsx]

## Sheet: Fig 1-A
Veh	6μg	18μg	30μg	60μg	60μg
8	1	12	26	60	8
4	10	3	9	31	9
3	2	23	25	23	13
1	3	1	31	22	16
3	12	10	30	48	11
3		44	12	52	2
12		20	20	42	12
18		20	50		27
		7	14		7
		13	6		14
		5	20		1
			55		7

## Sheet: Fig 1-B
	Histamine																				Bilirubin																				Chloroquine
0	0	0	0	0	0	0	0	0	0	0	0	0	0								0	0	0	0	0	0	0	0	0	0	0	0	0	0	0	0					0	0	0	0	0	0	0	0	0
5	0.0298507	0	0	0	0	0	0.134021	0	0	0.0102041	0	0	0								0	0	0	0.0967742	0.0833333	0.130435	0	0	0.226415	0	0	0	0	0.235294	0.0731707	0					0.20098	0.0384615	0.114894	0.107759	0.0540541	0	0.137363	0.0425532	0.242424
10	0.38806	0.527027	0.0285714	0.176471	0.214286	0.192308	0.391753	0.59375	0.434783	0.571429	0.0833333	0.181818	0.333333								0.178571	0.555556	0.32	0.322581	0	0.130435	0.04	0.15	0.264151	0	0.102564	0	0.352941	0.294118	0	0.0512821					0.235294	0.106509	0.221277	0.112069	0.145946	0.29932	0.362637	0.411347	0.626263
15	0.298507	0.391892	0.428571	0.235294	0.336735	0.384615	0.103093	0	0.543478	0.0714286	0.833333	0.654545	0.625								0.25	0.444444	0.32	0.225806	0.166667	0.391304	0.66	0.1	0.169811	0.511628	0.205128	0.5	0.294118	0.264706	0.195122	0.230769					0.348039	0.378698	0.144681	0.215517	0.367568	0.367347	0.401099	0.319149	0
20	0.268657	0.0810811	0.228571	0.411765	0.0816327	0.115385	0	0.234375	0.0217391	0.163265	0	0.163636	0.0416667								0.0714286	0	0.16	0.0645161	0.0833333	0.304348	0.1	0.45	0.150943	0.44186	0.487179	0.136364	0	0.0882353	0.219512	0.102564					0.161765	0.242604	0.268085	0.228448	0.183784	0.183673	0.0989011	0.0992908	0.121212
25	0.0149254	0	0.314286	0.176471	0.193878	0.307692	0.247423	0.171875	0	0.183673	0.0833333	0	0								0.0714286	0	0.2	0.0322581	0.333333	0.0434783	0.06	0.15	0	0.0465116	0	0.272727	0.176471	0.0588235	0.365854	0.615385					0.0539216	0.142012	0.144681	0.133621	0.0918919	0.136054	0	0	0
30	0	0	0	0	0.173469	0	0.123711	0	0	0	0	0	0								0.428571	0	0	0.258064	0.333333	0	0.14	0.15	0.188679	0	0.205128	0.0909091	0.176471	0.0588235	0.146342	0					0	0.091716	0.106383	0.202586	0.156757	0.0136054	0	0.12766	0.010101
[truncated: 2 more columns]

## Sheet: Fig 1-C
WT	Cluster KO
60	6
31	6
40	1
22	9
48	24
52	14
42	2
53	3
	5
	22
	1
	6
	7

## Sheet: Fig 1-D
	Heme-WT	Heme-KO	Biliverdin-WT	Biliverdin-KO	Uro-WT	Uro- KO	Sterco-WT	Sterco-KO
Stercobilin	27	11	0	0	26	17	62	0
Hematin	15	9	1	2	69	10	64	26
	13	2	0	10	105	30	36	1
Biliverdin	1	1	1	7	11	5	14	2
	3	16	9	14	26	3	17	5
	23	8	8	9	9	21	59
	23		9	3	91	8	35
	2				8	15
	7				58
	4				18
					22
					33
					59
					14
					8
