# Supplementary material for: Identification of a bilirubin receptor that may mediate a component of cholestatic itch
Source: eLife journal article supplement (doi:10.7554/elife.44116), 2019-01-18
Supplement: supp [file elife_poa_e44116_Figure_2_source_data_1.xlsx]

## Sheet: Fig 2-A
t
0.653		0.882	0.895	1.038	0.932	0.839	1.06
4.036		0.867	0.9	1.049	0.917	0.847	1.082
7.334		0.891	0.903	1.057	0.948	0.849	1.077
10.626		0.891	0.911	1.057	0.936	0.848	1.081
13.868		0.869	0.899	1.081	0.93	0.817	1.089
17.155		0.872	0.902	1.071	0.939	0.855	1.09
20.488		0.912	0.897	1.071	0.944	0.83	1.065
23.788		0.869	0.885	1.009	0.913	0.822	1.056
27.095		0.89	0.899	1.038	0.93	0.834	1.068
30.395		0.916	0.91	1.034	0.96	0.84	1.102
33.647		0.857	0.877	1.046	0.905	0.836	1.077
36.966		0.982	0.96	1.139	0.932	0.846	1.07
40.235		1.001	0.907	1.391	0.994	1.544	1.417
43.528		1.719	0.965	1.711	1.692	1.896	1.878
46.829		1.69	1.759	1.41	1.864	1.762	1.775
50.108		1.635	1.814	1.223	1.822	1.656	1.632
53.356		1.646	1.639	1.09	1.799	1.588	1.408
56.695		1.547	1.516	1.001	1.733	1.525	1.213
59.976		1.474	1.412	0.953	1.677	1.405	1.074
63.248		1.387	1.307	0.943	1.644	1.293	1.024
66.547		1.271	1.212	0.911	1.632	1.207	0.988
69.848		1.151	1.068	0.9	1.543	1.123	0.959
73.128		1.046	0.991	0.936	1.453	1.02	0.929
76.456		0.955	0.905	0.895	1.385	0.985	0.933
79.738		0.911	0.888	0.941	1.41	0.924	0.938
83.069		0.875	0.856	0.903	1.289	0.878	0.907
86.344		0.864	0.838	0.933	1.243	0.872	0.921
89.656		0.888	0.86	0.914	1.157	0.864	0.913
92.929		0.89	0.874	0.908	1.098	0.866	0.92
96.256		0.887	0.86	0.94	1.062	0.835	0.926
99.516		0.842	0.816	0.907	1.015	0.812	0.901
102.737		0.87	0.83	0.916	0.978	0.837	0.905
106.037		0.901	0.87	0.915	0.982	0.844	0.945
109.29		0.852	0.856	0.919	0.981	0.846	0.933
112.587		0.884	0.859	0.914	0.961	0.856	0.943
115.838		1.288	0.926	1.573	1.648	1.479	1.534
119.125		1.603	1.69	1.603	1.879	1.845	1.671
122.399		1.583	1.676	1.592	1.882	1.873	1.597
125.648		1.629	1.732	1.55	1.864	1.86	1.534

## Sheet: Fig 2-B
t
0.866		1.113	1.119	1.167
4.417		1.126	1.137	1.24
7.947		1.122	1.12	1.265
11.417		1.097	1.129	1.185
14.938		1.146	1.157	1.164
18.427		1.134	1.136	1.179
21.928		1.12	1.138	1.211
25.418		1.135	1.132	1.212
28.958		1.133	1.128	1.116
32.479		1.125	1.129	1.24
35.978		1.125	1.122	1.167
39.488		1.14	1.13	1.241
42.988		1.131	1.14	1.193
46.58		1.124	1.14	1.202
50.146		1.119	1.137	1.112
53.696		1.111	1.139	1
57.24		1.112	1.147	1.05
60.634		1.125	1.142	1.105
64.407		1.12	1.146	1.118
67.866		1.109	1.148	1.044
71.378		1.106	1.131	1.069
74.848		1.124	1.14	1.074
78.318		1.123	1.135	1.057
81.862		1.118	1.134	1.075
85.456		1.123	1.141	1.064
89.305		1.13	1.136	1.056

## Sheet: Fig 2-C
t
1.048		0.92	0.922	0.969	0.998
4.741		0.913	0.912	0.97	1.011
8.37		0.913	0.916	0.954	0.992
11.95		0.926	0.915	0.968	0.994
15.55		0.922	0.917	0.981	1.002
19.168		0.942	0.926	0.997	1.043
22.771		0.948	0.9	0.963	1.052
26.432		0.945	0.93	1.011	1.031
30.071		0.926	0.925	0.981	1.031
33.661		0.886	0.907	0.934	1.016
37.241		0.918	0.924	0.975	1.033
40.841		0.902	0.91	0.973	1.02
44.431		0.904	0.934	0.954	1.059
48.011		0.917	0.916	0.977	1.037
51.652		0.878	0.912	0.939	1.018
55.261		0.886	0.913	0.958	1.047
58.863		0.885	0.896	0.964	1.029
62.442		0.88	0.894	0.954	1.022
66.044		0.872	0.882	0.962	1.023
69.702		0.891	0.891	0.968	1.025
73.342		0.889	0.888	0.971	1.026
76.962		0.898	0.914	0.978	1.028
80.563		0.893	0.905	0.992	1.019
84.202		0.908	0.907	0.975	1.067
87.792		0.89	0.912	0.982	1.03
91.423		0.895	0.909	1.007	1.018
95.013		0.893	0.917	0.994	1.021
98.613		0.903	0.908	0.992	1.035

## Sheet: Fig 2-D
[Ligand] (M)	bilirubin			conjugated bilirubin			biliverdin			stercobilin
0.001				1.57226	1.55422	1.49936	0	0	0
0.0005	1.58228	1.56278	1.52213	1.4484	1.4326	1.42432	0	0	0
0.00025	1.51182	1.51267	1.45187	1.3325	1.3437	1.30094	0	0	0
0.000125	1.40938	1.36824	1.34206	1.21204	1.25441	1.21408	0	0	0
6.25e-05	1.23623	1.29313	1.25897	1.19003	1.18629	1.17658	0	0	0
3.125e-05	1.21434	1.21619	1.18623	1.22183	1.22546	1.22055	0	0	0
1.5625e-05	1.23893	1.23926	1.22913	1.25333	1.28253	1.25176	0	0	0
7.8125e-06	1.28495	1.27157	1.24426	1.22147	1.27572	1.27254	0	0	0
3.90625e-06	1.24434	1.27032	1.24421

## Sheet: Fig 2-E
[Ligand] (M)	bilirubin			conjugated bilirubin			hemin
3.05e-08	6.01541	6.88162	3				0	7.40337	3
6.1e-08	5.1124	7.88727	3				0	3.85575	3
1.221e-07	3.41046	2.22313	3	8.86354	6.69674	3	0	22.5691	3
2.441e-07	3.27101	2.46246	3	12.0246	10.7902	3	0	3.52411	3
4.883e-07	-3.22635	5.80635	3	-13.1442	4.30317	3	0	0.998591	3
9.766e-07	-3.39078	7.63916	3	10.2399	12.9967	3	0	4.47442	3
1.9531e-06	7.10937	3.56177	3	-8.00597	3.80595	3	0	15.3359	3
3.9063e-06				-10.5584	3.23615	3	0	10.3863	3
7.8125e-06	1.33401	10.2487	3	-9.56222	4.40625	3	0	5.11686	3
1.5625e-05	2.3419	7.94898	3	-5.78912	2.98172	3	0	7.49104	3
3.125e-05	16.9295	3.74708	3	-4.24044	3.81407	3	0	16.0321	3
6.25e-05	43.5974	3.11716	3	37.7812	17.743	3	0	8.06632	3
0.000125	64.6366	10.0869	3	5.5559	9.2311	3	0	6.05681	3
0.00025	80.7081	11.1776	3	6.13377	10.0838	3	0	5.44467	3
0.0005	102.789	5.389	3	25.273	11.9224	3	0	5.93389	3
0.001	103.048	5.39544	3	43.2348	22.6953	3

## Sheet: Fig 2-F
t
0.709		1	1.00251	1.0201	0.984925	0.964824	1	1.00081	1	1	1	1
4.295		1.00754	1.0201	1.02889	0.977387	0.969849	1.02117	0.977236	1.00149	1.02212	1.00928	0.995945
7.833		1.01382	1.01633	1.02513	0.987437	0.972362	1.02794	1.0187	1.02229	1.01896	1.0232	0.978913
11.363		0.964824	0.968593	0.977387	0.932161	0.95603	1.01524	1.00081	1			1.06813
14.854		0.953518	0.940955	0.954774	0.920854	0.909548	1.0398	0.977236	1.00149
18.394		0.923367	0.914573	0.925879	0.889447	0.919598	1.05165	1.00081	1.02229
21.904		0.903266	0.888191	0.893216	0.861809	0.895729	1.01863	0.977236
25.404		0.883166	0.870603	0.880653	0.863065	0.88191	1.06096	1.00081
28.942		0.900754	0.884422	0.888191	0.876884	0.909548	1	1.00081
32.443		0.895729	0.874372	0.884422	0.880653	0.914573	1.02117	0.977236	1
36.034		0.903266	0.889447	0.873116	1.02638	1.19221	1.02794	0.977236	1.02229	1.01896	1.00928	0.978913
39.565		0.903266	0.893216	0.873116	1.68091	1.53895	1.01524	1.0187	1.23923	1.37046	1.17015	1.06813
43.125		1.05653	0.937186	0.884422	1.73116	1.76131	1.21253	1.39512	1.31129	1.50395	1.31554	1.15977
46.661		2.16709	1.42588	1.27387	1.72111	1.78518	1.32684	1.83496	1.37519	1.54423	1.37819	1.18978
50.292		2.14196	1.82789	1.7701	1.7902	1.76256	1.43607	2.09024	1.36701	1.50395	1.32483	1.19789
53.844		2.16709	2.26256	2.14447	1.78392	1.90829	1.4945	2.09756	1.34621	1.52607	1.35731	1.36172
57.405		2.38568	2.18342	2.34422	1.90452	1.90452	1.49534	2.2065	1.31204	1.50237	1.32019	1.48824
60.854		2.51256	2.08417	2.32412	2.02513	2.02261	1.46825	2.18537	1.29049	1.45656	1.33411	1.55231
64.422		2.53895	2.02764	2.1093	2.05151	2.17965	1.44284	2.26098	1.21917	1.38547	1.34493	1.6399
67.963		2.56909	1.90704	2	2.03141	2.26759	1.46232	2.24715	1.20951	1.38626	1.32483	1.45012
71.596		2.5402	1.78643	1.8907	1.97613	2.30528	1.39204	2.1626	1.15379	1.35703	1.29466	1.38037
75.015		2.34673	1.67714	1.68091	1.88191	2.25126	1.35309	2.2252	1.17459	1.3049	1.2908	1.45012
78.485		2.23116	1.55402	1.59296	1.80528	2.14573	1.28789	2.16423	1.1003	1.16035	1.23047	1.47202
81.995		2.02387	1.41332	1.45603	1.72111	2.05025	1.22862	2.1065	1.11218	1.14771	1.20572	1.34874
85.645		1.88568	1.32161	1.47236	1.67337	1.97362	1.17866	2.16016	1.09881	1.07504	1.18407	1.37632
89.195		1.60553	1.23744	1.2299	1.59422	1.92085	1.16342	2.03821	1.0951	1.08373	1.17247	1.49959
91.104		1.46231	1.23116	1.17965	1.55151	1.90704	1.15919	1.91789	1.0951	1.03713	1.15932	1.66099
94.594		1.33417	1.08543	1.08292	1.3304	1.67085	1.0906	1.76829	1.09064	1.0387	1.12761	1.55393
98.044		1.25879	1.0892	1.04271	1.25377	1.58543	1.0652	1.70163	1.06241	1.02133	1.09049	1.49473
101.494		1.17462	1.05528	1.00628	1.17337	1.52261	1.0508	1.55203	1.07281	1.03554	1.13612	1.80292
104.975		1.14824	1.0603	1.06533	1.08292	1.44849	1.0652	1.51301	1.07058	1.02291	1.14617	1.55799
108.454		1.15704	1.04271	1.04774	1.02261	1.46105	1.0508	1.47073	1.07281	1.03634	1.12838	1.56529
111.945		1.13568	1.04146	1.04899	1.0201	1.42588	1.0652	1.4561	1.05943	1.0387	1.09822	1.43228
115.375		1.10427	1.0402	1.05276	1.01005	1.38568	1.0508	1.41382	1.06092	1.01501	1.08043	1.23358

## Sheet: Fig 2-G
t
0.725		1	1	1
4.226		1.0144	0.995633	1.00553
7.747		1.0072	1.00087	1.00553
11.237		1.00103	0.982533	0.994475
14.707		1.00514	0.99214	1
18.226		1.00823	0.968559	0.989871
21.706		1.01235	0.976419	1
25.186		1.00926	0.974673	0.993554
28.686		1.0072	0.970306	0.991713
32.177		1.01543	0.970306	0.994475
35.677		1.01029	0.963319	1.0046
39.168		1.01646	0.966812	0.994475
42.697		1.03189	0.975546	1.00184
46.187		1.0144	0.945851	0.992633
49.688		1.02469	0.957205	0.998158
53.178		1.02984	0.956332	1.0046
56.647		1.02469	0.953712	1
60.137		1.02778	0.956332	1.00368
63.637		1.03601	0.964192	0.999079
67.189		1.03189	0.941485	1.00092
70.658		1.03601	0.947598	1.01658
74.178		1.03395	0.951092	1.00921
77.689		1.04012	0.955458	1.00645
81.17		1.05247	0.952838	1.0175
84.718		1.03292	0.955458	1.01658
88.209		1.05144	0.964192	1.02118

## Sheet: Fig 2-H
t
0.819		0.995	0.97	0.99	0.853	0.874	1.017
4.452		1.021	0.987	1.003	0.865	0.9	1.041
8.011		0.971	0.948	0.965	0.837	0.85	0.973
11.651		1.003	0.968	0.987	0.849	0.875	1.008
15.231		0.994	0.969	0.987	0.848	0.866	0.994
18.843		0.993	0.963	0.987	0.848	0.867	0.989
22.453		1	0.967	0.989	0.861	0.885	1.005
26.072		0.999	0.964	0.987	0.85	0.861	1.001
29.682		1.039	0.977	1.004	0.876	0.886	1.049
33.303		1.007	0.975	0.989	0.864	0.879	1.004
36.932		0.979	0.973	1.001	0.845	0.866	0.992
40.552		1.048	0.974	0.987	0.862	0.872	1.055
44.121		0.961	0.974	0.959	0.823	0.842	0.949
47.702		1.006	0.984	0.966	0.853	0.856	0.999
51.334		0.989	0.977	0.962	0.838	0.847	0.983
54.953		0.993	0.979	0.972	0.849	0.863	0.981
58.573		1.006	0.983	0.967	0.848	0.868	0.981
62.202		1.041	0.98	0.967	0.861	0.886	1.009
65.782		0.957	1.016	0.997	0.854	0.928	1.073
69.353		1.008	0.99	0.96	0.855	0.923	0.999
72.963		1.007	0.981	0.955	0.858	0.945	1.002
76.594		1.016	0.975	0.955	0.868	0.96	1.021
80.163		0.997	0.971	0.953	0.854	0.965	0.994
83.843		1.004	0.982	0.971	0.879	0.984	0.988
87.454		1.006	0.988	0.965	0.862	1.002	0.999
91.044		1.014	0.972	0.972	0.857	0.986	1.003
94.684		1.024	0.983	0.97	0.865	0.988	0.987
98.283		1.028	0.975	0.969	0.868	0.99	0.989
101.873		1.024	0.979	0.966	0.856	0.998	0.989

## Sheet: Fig 2-I
[Ligand] (M)	bilirubin			conjugated bilirubin			biliverdin			stercobilin
0.001							0	0	0
0.0005				1.775	1.77908	1.73959	0	0	0
0.00025	1.64322	1.59509	1.52412	1.73515	1.73619	1.6528	0	0	0
0.000125	1.45084	1.46354	1.38242	1.75552	1.62874	1.66583	0	0	0
6.25e-05	1.17809	1.23394	1.12186	1.76084	1.60992	1.51995	0	0	0
3.125e-05	0.925916	0.922209	0.816222	1.62298	1.44941	1.37755	0	0	0
1.5625e-05	0.588607	0.713057	0.57395	1.43935	1.33985	1.33184	0	0	0
7.8125e-06	0.782751	0.746516	0.817261	1.45359	1.38369	1.35354	0	0	0
3.90625e-06	0.559595	0.973484	0.910174	1.43415	1.4137	1.36062
1.95313e-06	0.665678	0.529193	0.882021

## Sheet: Fig 2-J
[Ligand] (M)	bilirubin			conjugated bilirubin			hemin
3.05e-08	7.58436	10.0812	3	14.6332	6.74176	3	0	18.614	3
6.1e-08	6.44423	9.18174	3	-0.394898	3.87543	3	0	8.32512	3
1.221e-07	6.44167	9.66835	3	-3.18595	8.55759	3	0	8.29929	3
2.441e-07	4.05089	12.2963	3	10.7277	6.92953	3	0	5.41235	3
4.883e-07	-2.45965	17.2334	3	1.18016	12.2089	3	0	1.08849	3
9.766e-07	-5.39294	15.9925	3	3.79854	1.73106	3	0	11.9223	3
1.9531e-06	5.84	26.5507	3	8.12473	6.05389	3	0	7.13676	3
3.9063e-06	1.01702	16.95	3	1.99346	3.08065	3	0	11.6727	3
7.8125e-06	9.66014	17.1852	3	2.93321	7.39801	3	0	6.03926	3
1.5625e-05	19.4349	9.9495	3	-0.662021	9.26181	3	0	22.2479	3
3.125e-05	35.6519	15.7267	3	8.64024	3.88566	3	0	14.5549	3
6.25e-05	68.0309	6.3584	3	18.6992	1.61682	3	0	8.93689	3
0.000125	97.8035	10.6947	3	39.4499	6.27145	3	0	0	3
0.00025	117.52	13.9046	3	46.5687	2.60412	3	0	0	3
0.0005	123.698	14.0531	3	49.0399	7.59034	3	0	0	3
0.001	119.096	21.8563	3	52.0554	8.54651	3

[truncated: 5 more sheets: Fig 2-K, Fig 2-L, Fig 2-M, Fig 2-N, Fig 2-O]
