# Supplementary material for: Identification of a bilirubin receptor that may mediate a component of cholestatic itch
Source: eLife journal article supplement (doi:10.7554/elife.44116), 2019-01-18
Supplement: supp [file elife_poa_e44116_Figure_5_source_data_1.xlsx]

## Sheet: Fig 5 - B
WT	Cluster	A1 KO				WT	Cluster	A1 KO
5	0	2				34	39	21
10	1	0				33	18	8
2	15	4				35	16	5
0	26	0				44	13	23
4	2	1				66	22	14
2	1	15				114	19	7
1						119	12	13
3						66	28
12						49	27	26
11						28	62	10
23						61	0	13
20						42	1	24
24						38	34	12
5						28	15	26
7						66		44
						22
						25
						27

## Sheet: Fig 5 - C
WT	BVRKO			WT	BVRKO
5	21			22	9
10	12			25	102
7	19			34	37
12	3			33	48
23	8			35	20
	3			44	17
	7			66	3
	24			102	14
				65	7
				38	5
				26	22
				19	24
				15	11
				35	12
				14	28
				21	3
				35	12
				40	34
				35	30
				38	21
				99

## Sheet: Fig 5 - D
WT	Cluster KO	WT	Cluster KO
0.8		2.7	2
0.8		2.1	1.4
0.5		1.1	2.9
0.6	0.8	1.8	6.1
0.6	0.5	1.5	3.1
0.2	0.7	1.1	1.5
0.1	0	1	2
0		4.9	1.4
0.1		1.8	0.6
0.8		2.7	4.9
1		2.1
0.8		2.5
0.6		1.3
0.5

## Sheet: Fig 5 - E
	WT	cluster	BVRKO	WT	cluster	BVRKO
Bile Acids*	8.5	26.0756	12	48	147	103.3
	0.5	1.00906	46	123	92.6	92.1
	5.5	0.375518	8	48.6	73.3	90
	2.8	7.48146	19	59.1		87
		16.9291	3	125.5		65
				120.74		114
				181	79	60
				107.7	70	39
				79.4		30.4
				109.5	76	102.5
					58.2	120
						154
						140
						82.5

## Sheet: Fig 5 - G and H
WT	A1 KO	BVR KO	WT	A1 KO	BVR KO
1	20	19	140	39	24
3	24	4	42	13	18
7	5	10	16	23	12
11	7	2	27	10	36
23	0	6	62	7	24
			13	17	32
			32	9	11
			29	5
			41
			17
			47
			84

## Sheet: Fig 5 - I
br	scratches
4.03206	26
7.49915	22
1.13673	3
4.65383	6
10.5106	33
11.1239	11
11.7047	3
10.5011	13
17.3866	127
23.3896	33
30.713	52
50.35	21
69.89	30
57.19	16
45.03	17
5.13	22
6.84	56.5
6.84	36.5
5.13	18
3.42	13
3.42	31.5
5.13	16
5.13	7
13.68	17
8.55	24
87.21	34.5
17.1	52.5
41.04	37
6.84	35
11.97	70.5
104.31	102.5
145.35	49
8.55	69
6.84	33.5
11.97	64.5

## Sheet: Fig 5 - J
br	scratches
0.19928	26
0.74642	22
1.16988	3
1.77506	6
1.02382	33
0.54374	11
0.76682	3
0.227	13
2.35118	127
4.09586	33
5.34988	52
0.29256	21
0.30558	30
0.25876	16
0.32564	17
0.61737	22
1.31035	56.5
1.09841	36.5
0.663707	18
0.443588	13
0.907196	31.5
0.273612	16
1.30472	7
0.649467	17
0.35889	24
1.68326	34.5
1.8384	52.5
1.61941	37
2.02325	35
0.966786	70.5
4.54721	102.5
2.35143	49
2.30034	69
2.56537	33.5
3.12111	64.5

## Sheet: Fig 5 - K
skin	serum
0.19928	4.03206
0.74642	7.49915
1.16988	1.13673
1.77506	4.65383
1.02382	10.5106
0.54374	11.1239
0.76682	11.7047
0.227	10.5011
2.35118	17.3866
4.09586	23.3896
5.34988	30.713
0.29256	50.35
0.30558	69.89
0.25876	57.19
0.32564	45.03
0.61737	5.13
1.31035	6.84
1.09841	6.84
0.663707	5.13
0.443588	3.42
0.907196	3.42
0.273612	5.13
1.30472	5.13
0.649467	13.68
0.35889	8.55
1.68326	87.21
1.8384	17.1
1.61941	41.04
2.02325	6.84
0.966786	11.97
4.54721	104.31
2.35143	145.35
2.30034	8.55
2.56537	6.84
3.12111	11.97
