# Supplementary material for: Identification of a bilirubin receptor that may mediate a component of cholestatic itch
Source: eLife journal article supplement (doi:10.7554/elife.44116), 2019-01-18
Supplement: supp [file elife_poa_e44116_Figure_7_source_data_1.xlsx]

## Sheet: Fig 7 - B
WT	BVRKO			WT	BVRKO
5	21			22	9
10	12			25	102
7	19			34	37
12	3			33	48
23	8			35	20
	3			44	17
	7			66	3
	24			102	14
				65	7
				38	5
				26	22
				19	24
				15	11
				35	12
				14	28
				21	3
				35	12
				40	34
				35	30
				38	21
				99

## Sheet: Fig 7 - C
contorl
	82	94	9	20	11	20	23	3	12	19	10	18
	33	97	27	83	13	16	13	25	40	16	9	28
	78	37	35	39	27	79	108	28	13	7	43	75
	47	81	17	33	25	78	18	10	22	19	20	30
	45	55	47	39	51			98
cholestasis
		229	136	95	56	135	166	230	58	125	17	132	24
		142	47	55	44	160	31	271	141	138	80	45	54
		216	233	121	34	142	82	227	175	65	46	57	37
		146	111	93	51	183	64	321	136	90	42	54	16
		129	87	99	105	113	20	207	120	132	97	74	31
		70	53	102		293	237	214	24		25	65
		179	28	98		126	113	180	201			41
			47	95			27		324
			106

## Sheet: Fig 7 - D
cntrol		cholesasis
WT	A1	WT	A1
82	94	229	136
33	97	142	47
78	37	216	233
47	81	146	111
45	55	129	87
9	20	70	53
27	83	179	28
35	39		47
17	33		106
47	39	95	56
11	20	55	44
13	16	121	34
27	79	93	51
25	78	99	105
51		102
23	3	98
13	25	95
108	28	135	166
18	10	160	31
	98	142	82
12	19	183	64
40	16	113	20
13	7	293	237
22	19	126	113
10	18		27
9	28	230	58
43	75	271	141
20	30	227	175
		321	136
		207	120
		214	24
		180	201
			324
		125	17
		138	80
		65	46
		90	42
		132	97
			25
		132	24
		45	54
		57	37
		54	16
		74	31
		65
		41

## Sheet: Fig 7 - G
NT	FeCl3	NT	FeCl3	NT	FeCl3
63	45	229	75	230	117
62	53	142	132	271	53
35	51	216	54	227	60
14	41	146	111	321	60
43	34	129	173	207	54
53		70	58	214	67
		179	34	180

## Sheet: Fig 7 - H
IgG	Anti-Bili	IgG	Anti-Bili
132	51	149	94
149	86	193	125
164	155	147	122
103	66	220	51
162	29	187	33
	57		94
	162
