# Supplementary figures and images for: Identification of a bilirubin receptor that may mediate a component of cholestatic itch
Source: eLife journal article supplement (doi:10.7554/elife.44116), 2019-01-18

**A**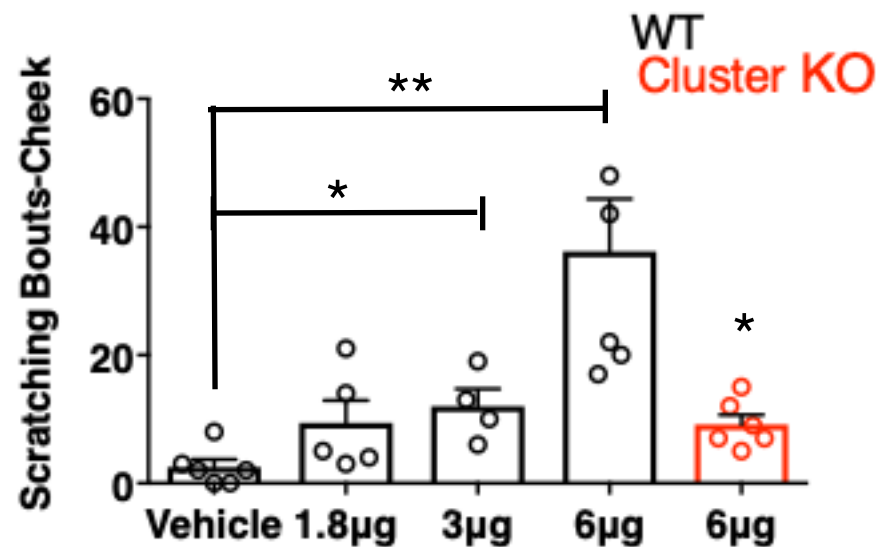**B**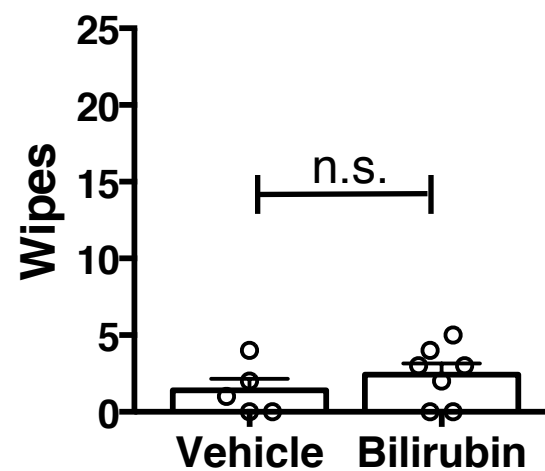**C**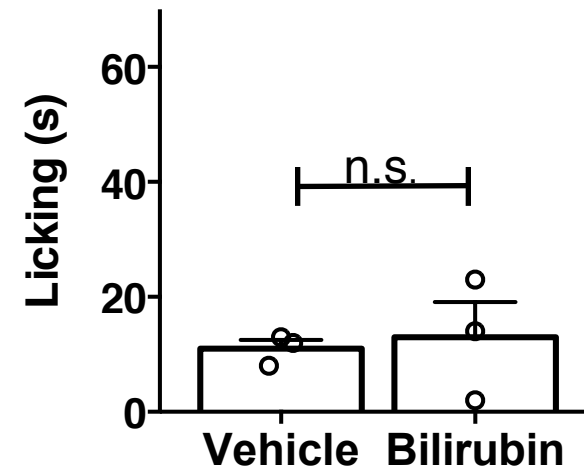**D**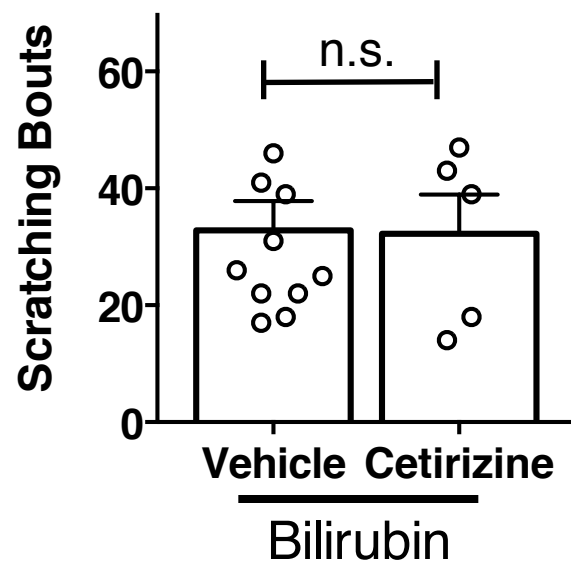**E**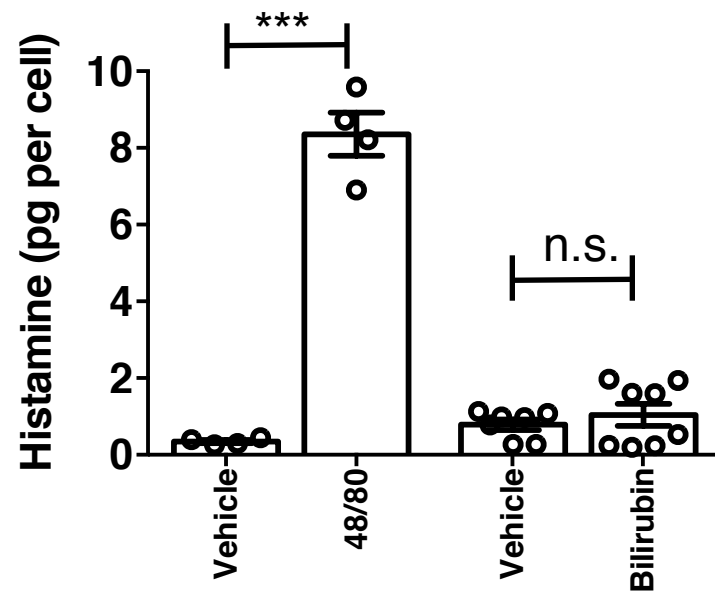**F**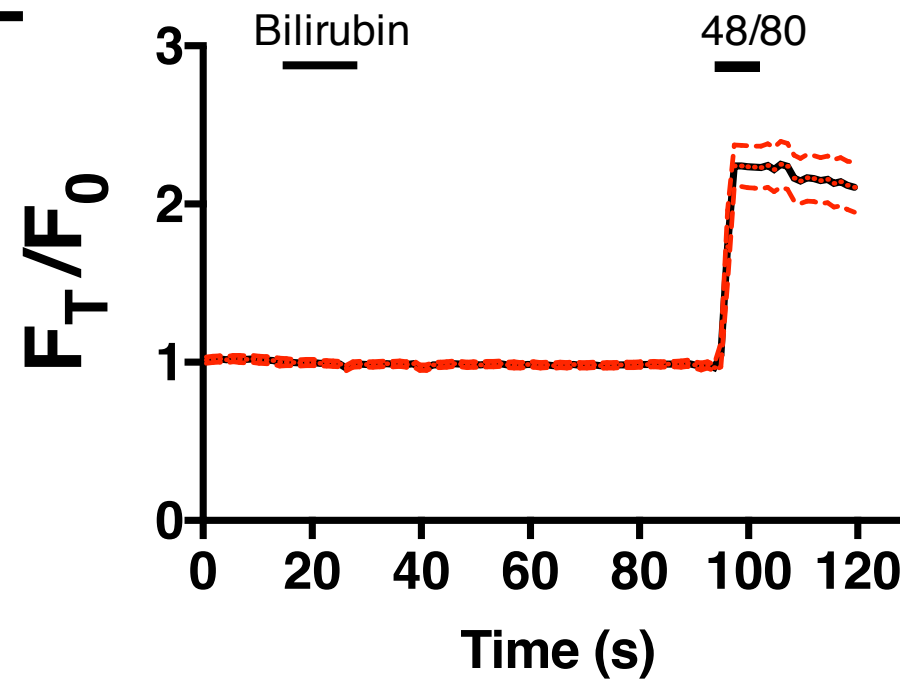

Supplement: supp [file elife-44116-supp-v1.zip]

## BLVRA mRNA

**A**

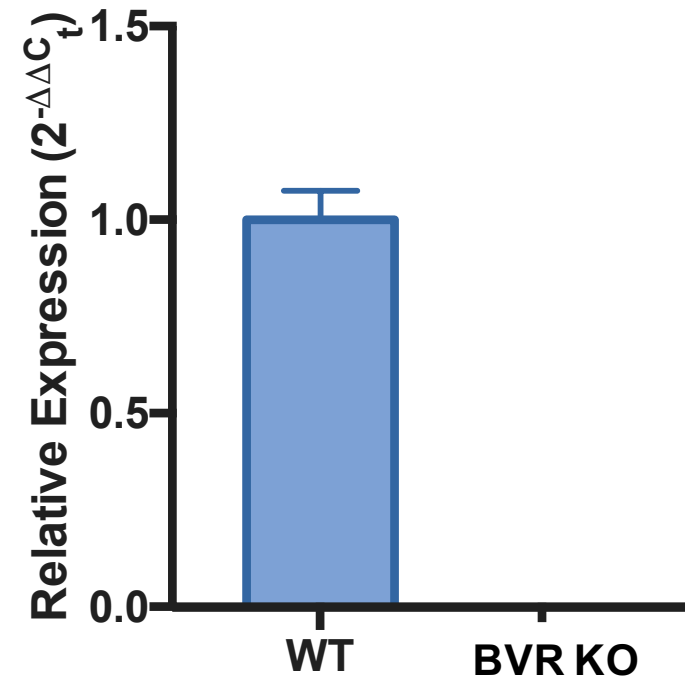

**B**

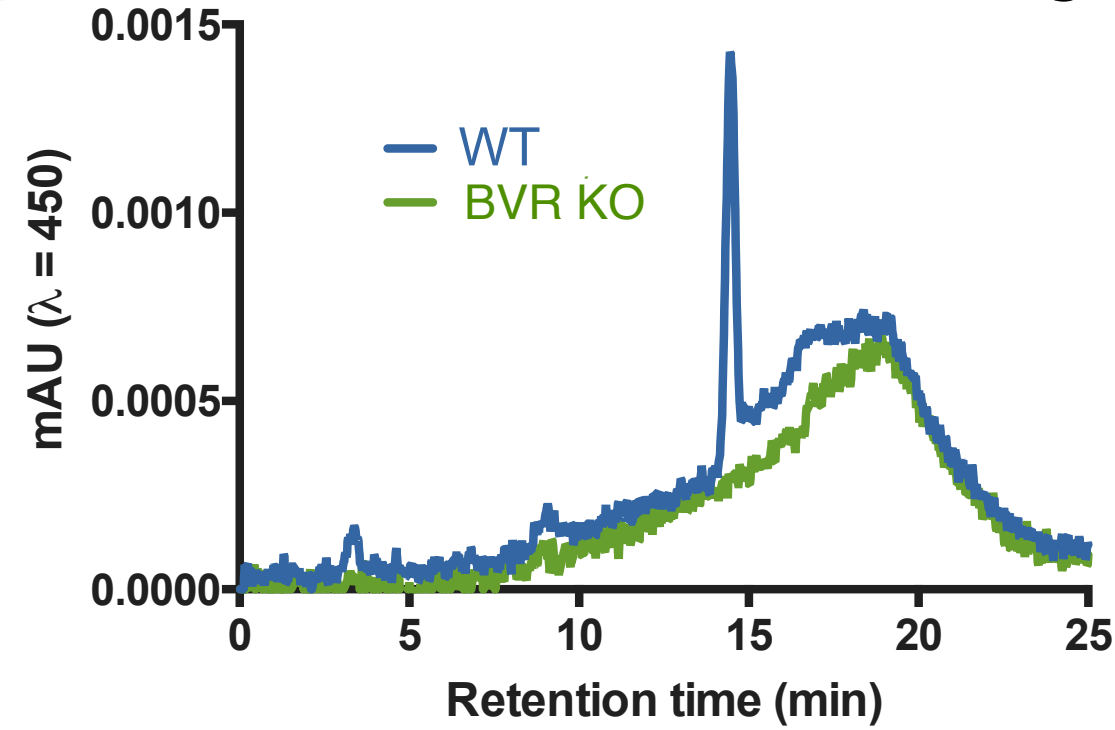

**C**

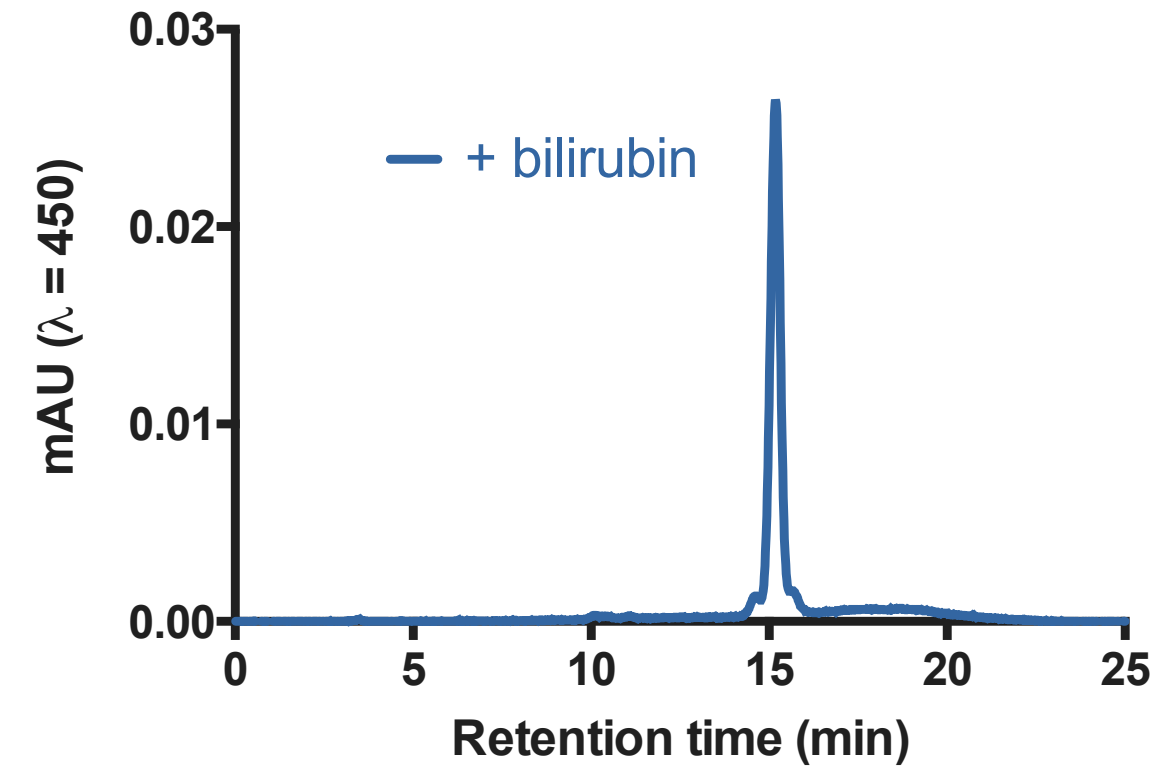

**D**

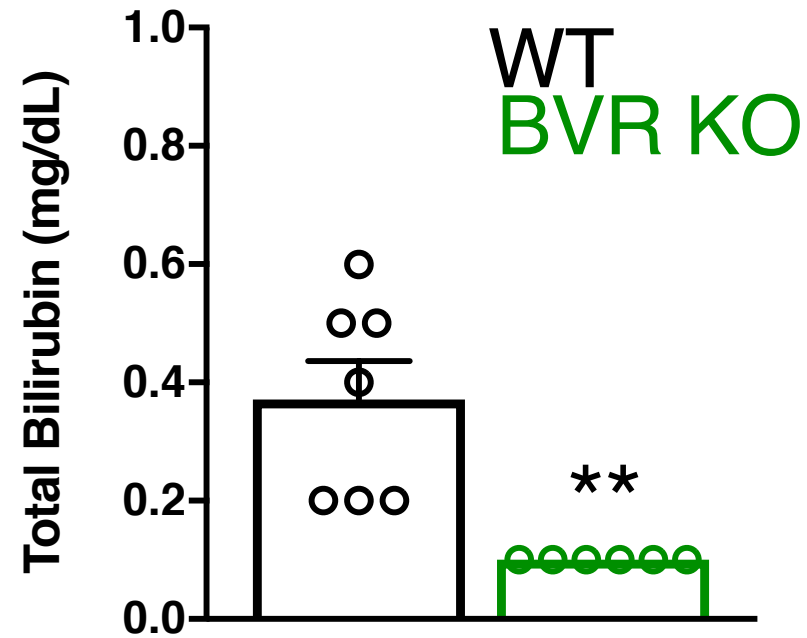

**E**

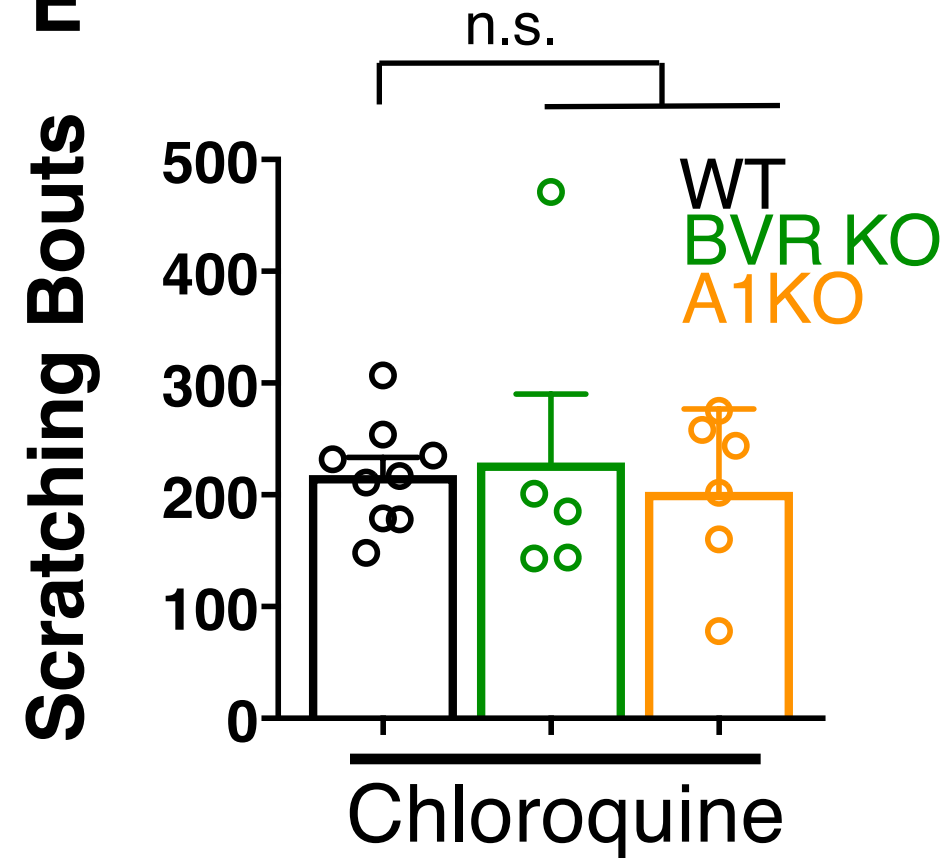

**F**

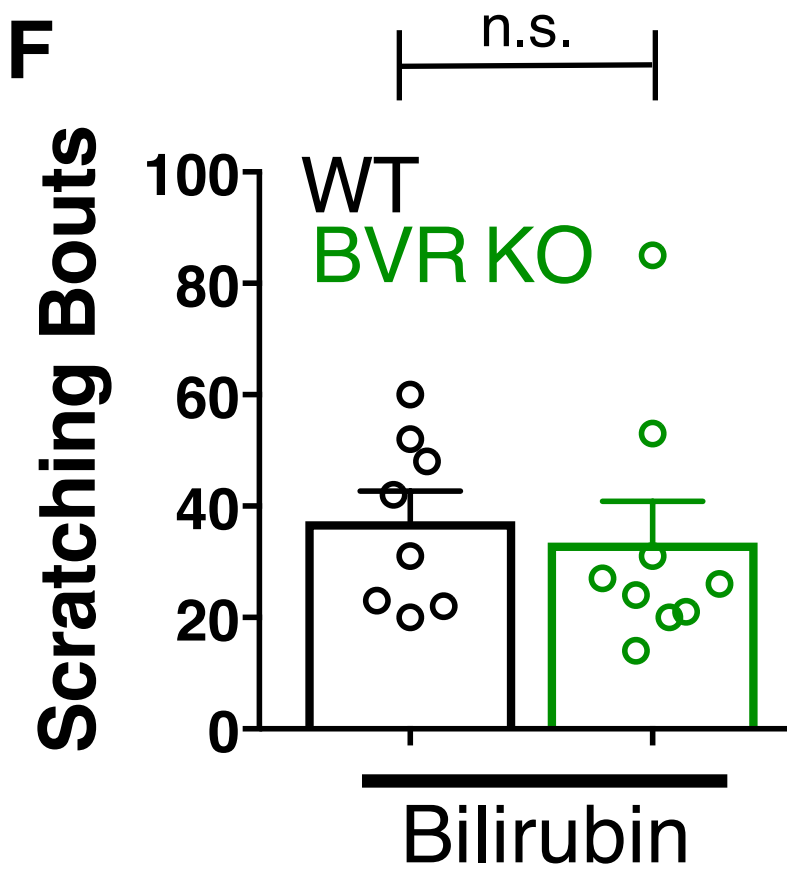

Supplement: supp [file elife-44116-supp-v1.zip]

**A**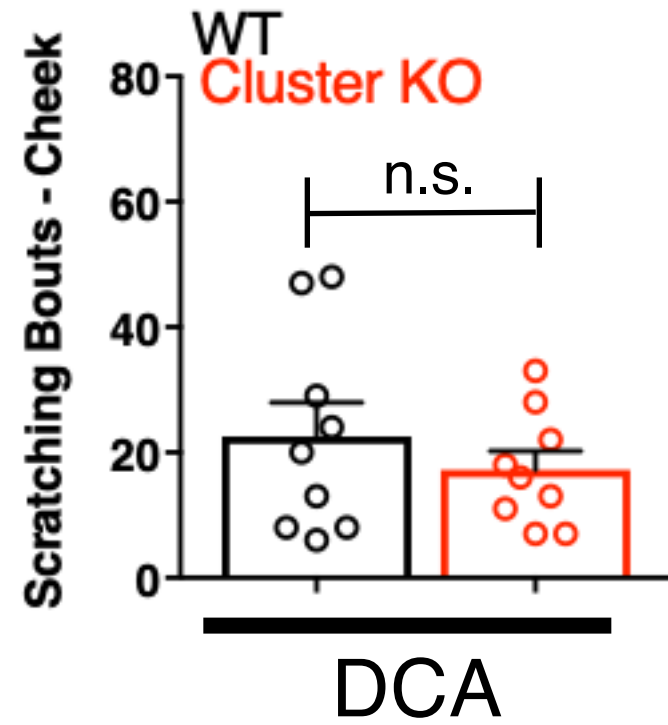**B**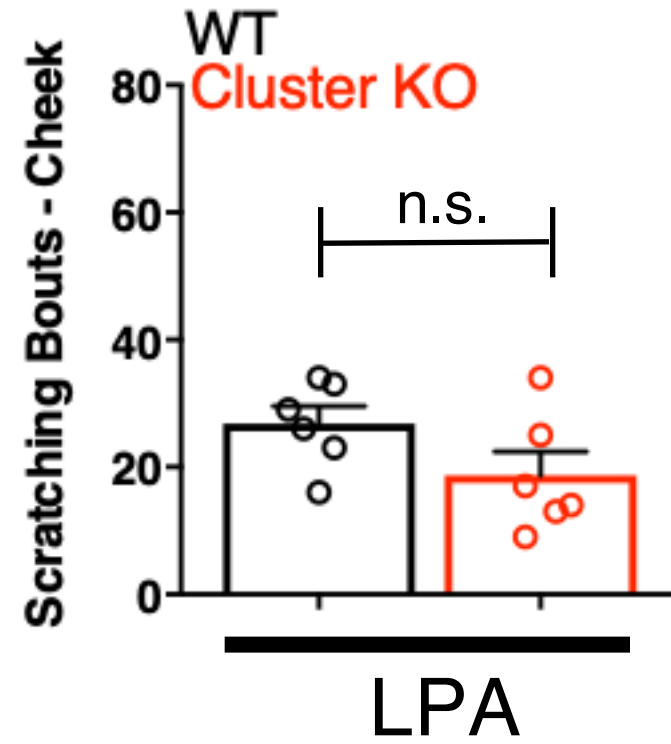**C**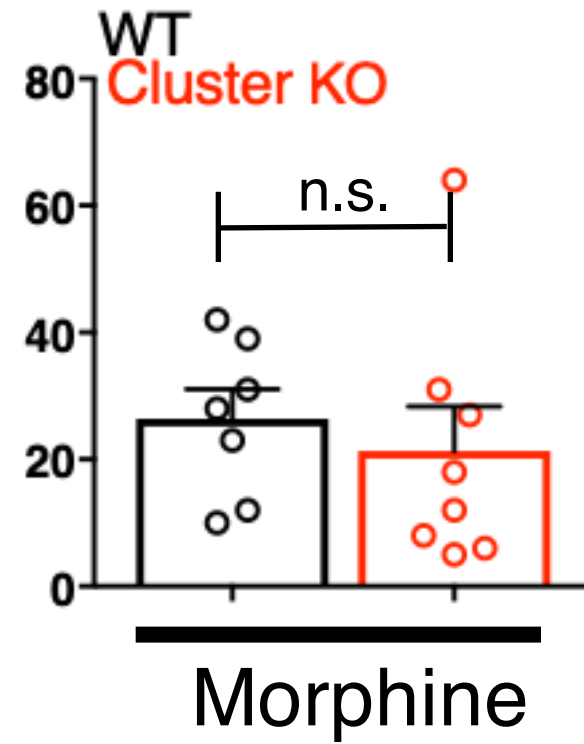**D**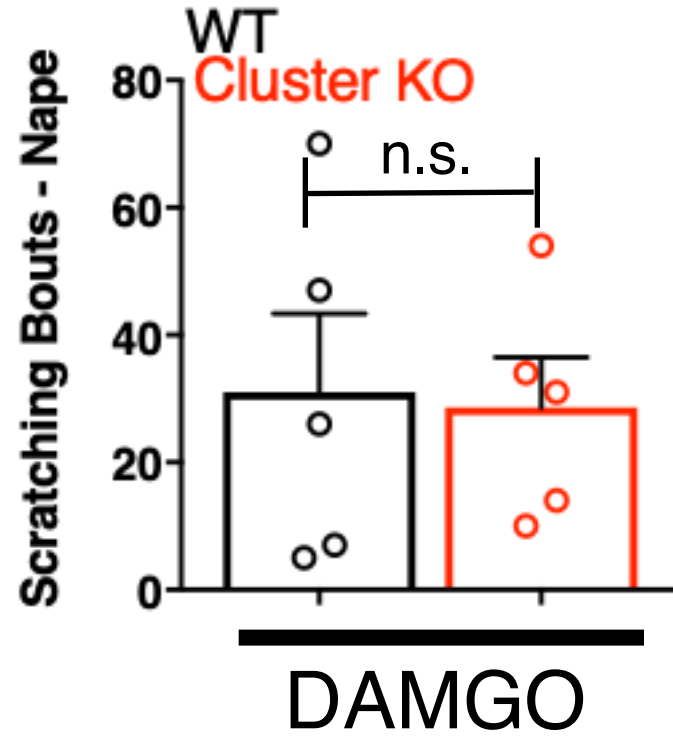

Supplement: supp [file elife-44116-supp-v1.zip]

**A**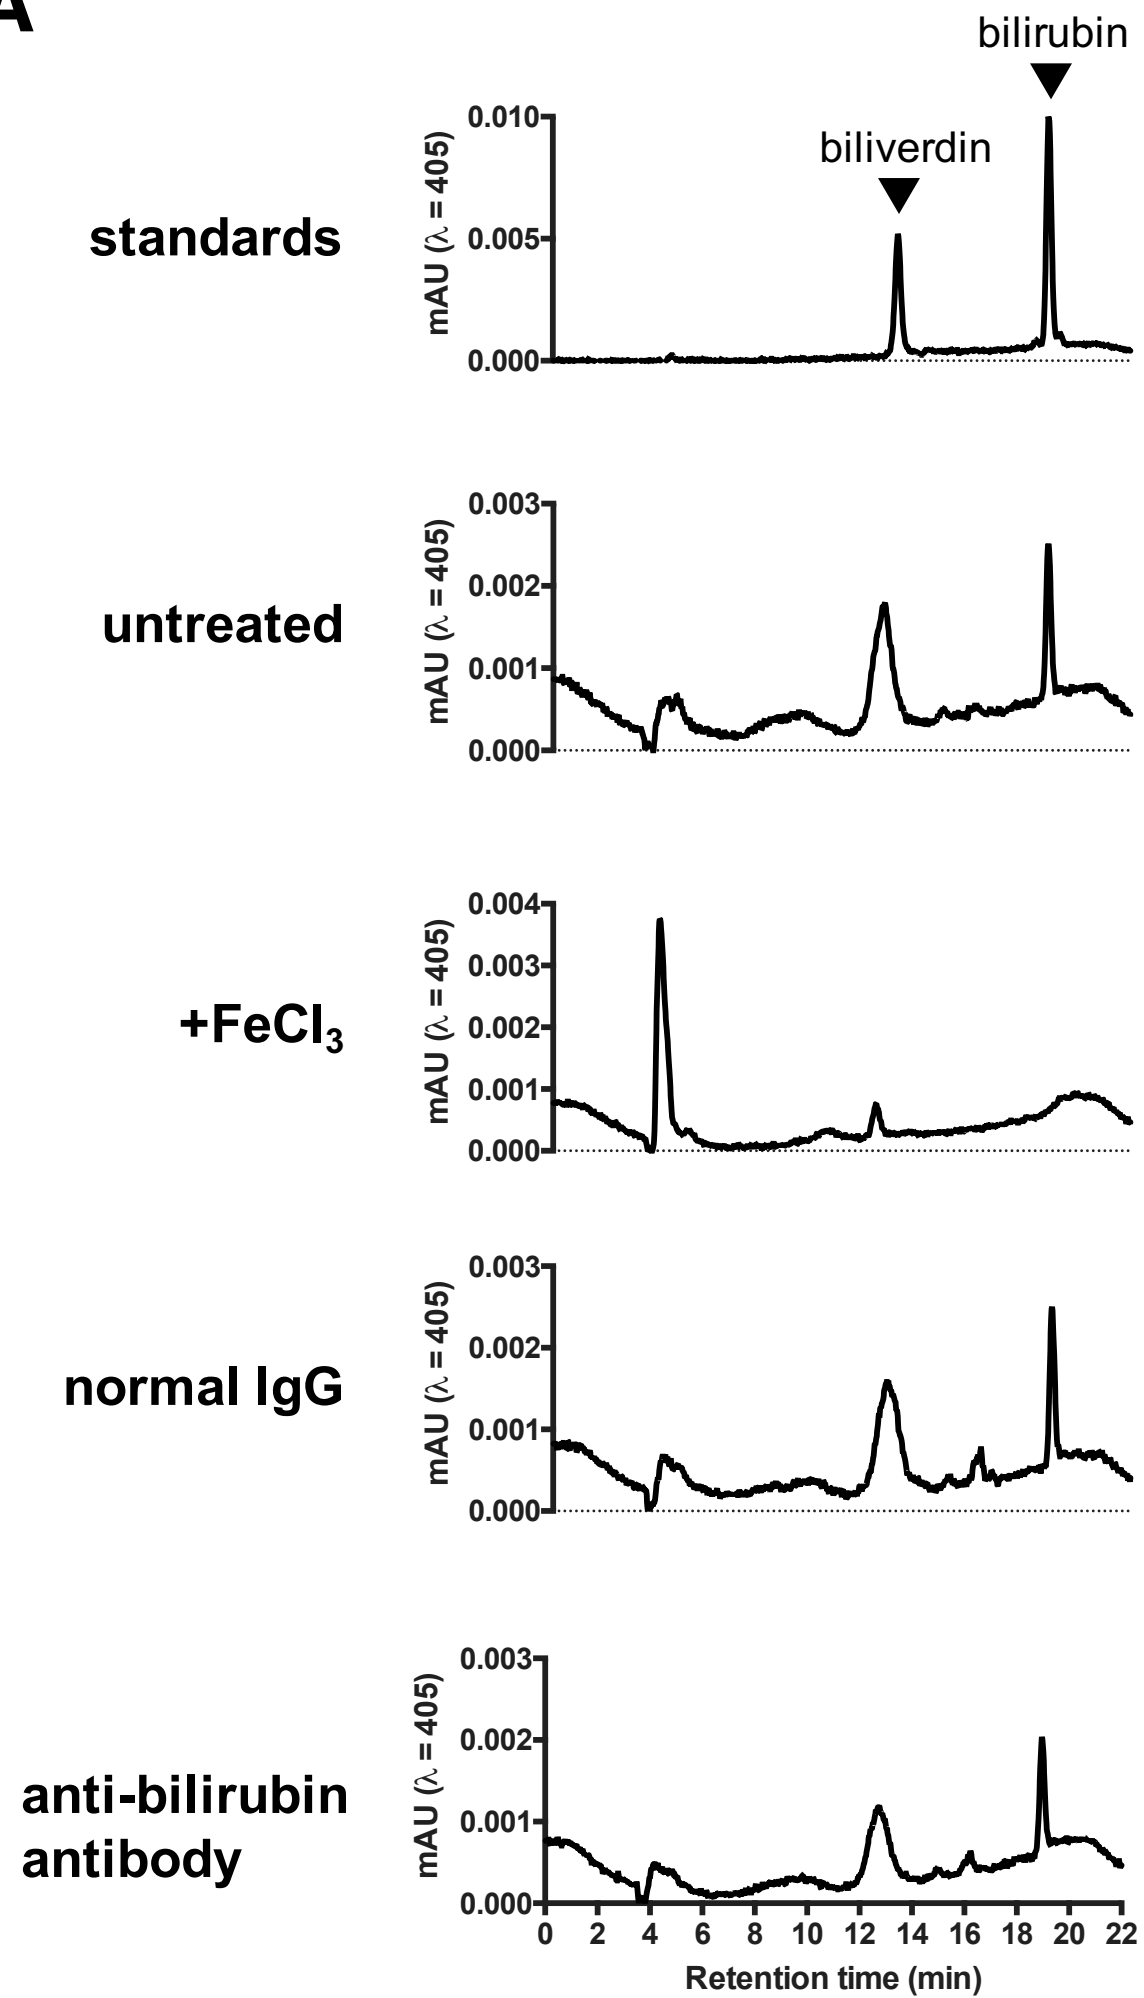**B**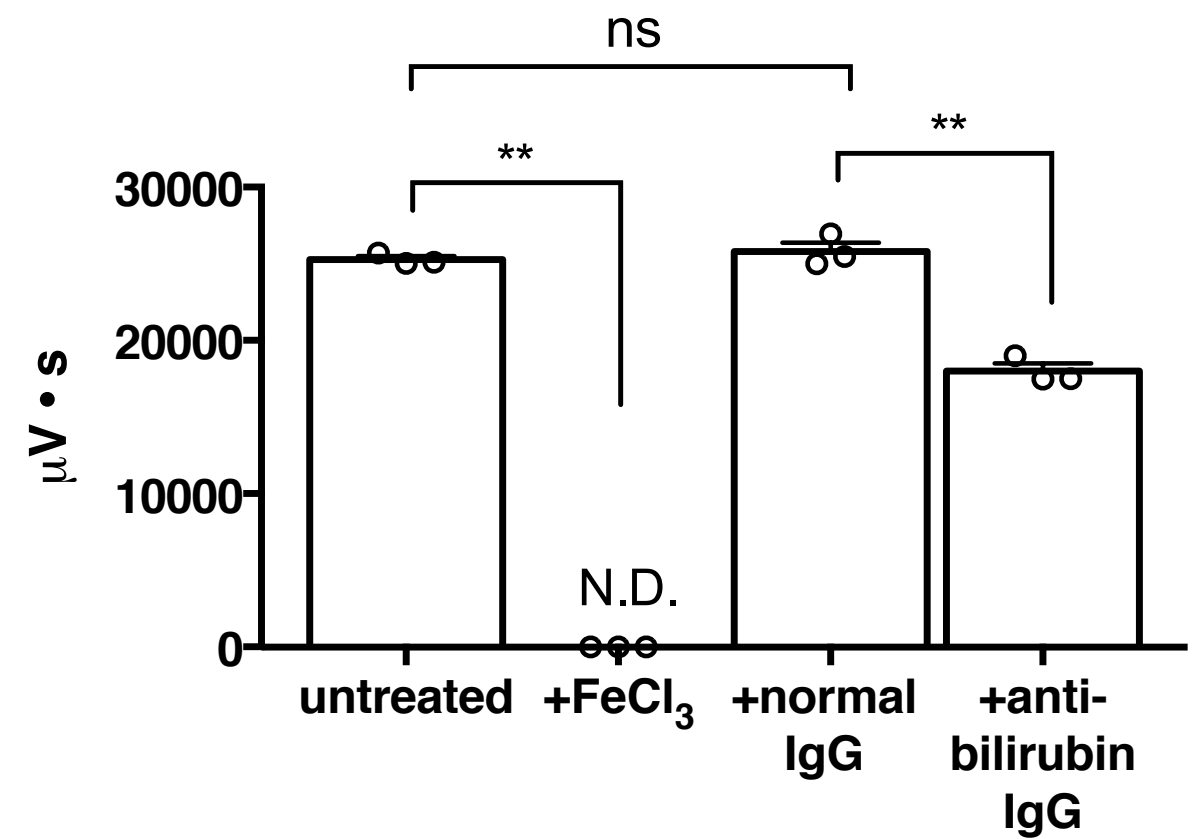

Supplement: supp [file elife-44116-supp-v1.zip]

**A**

MRGPRA3

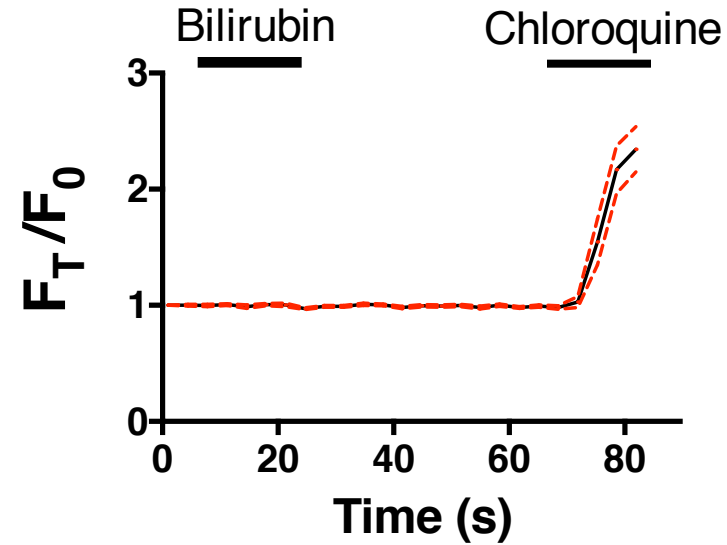**B**

MRGPRC11

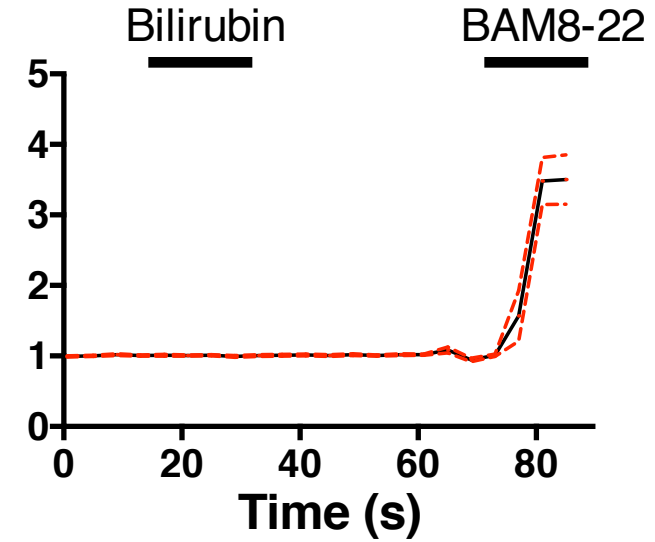**C**

MRGPRD

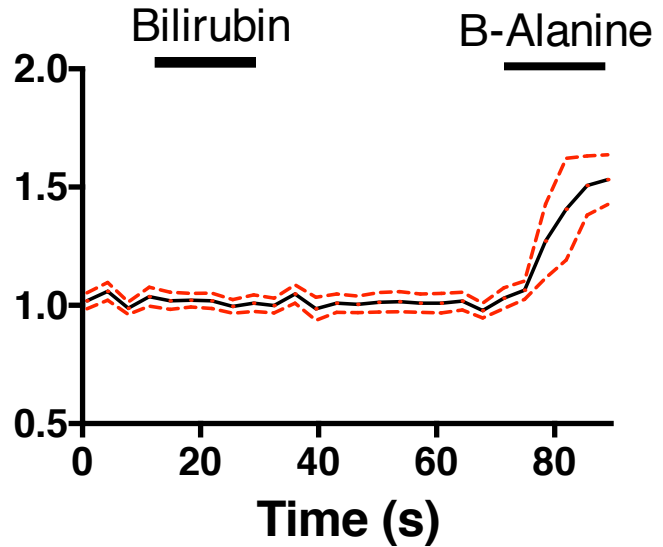**D**

MRGPRX1

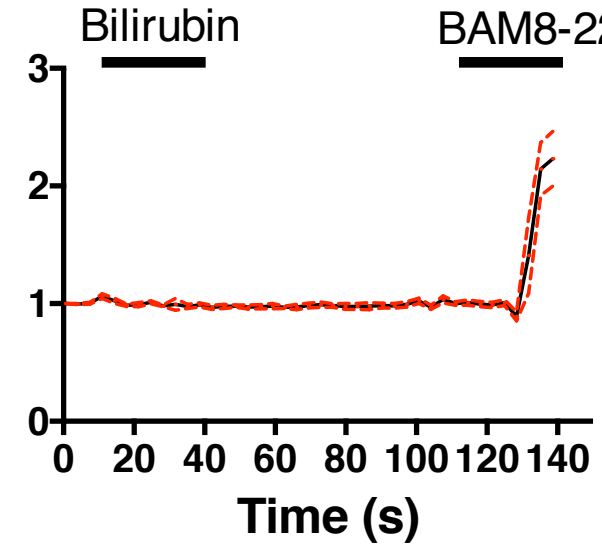**E**

MRGPRX2

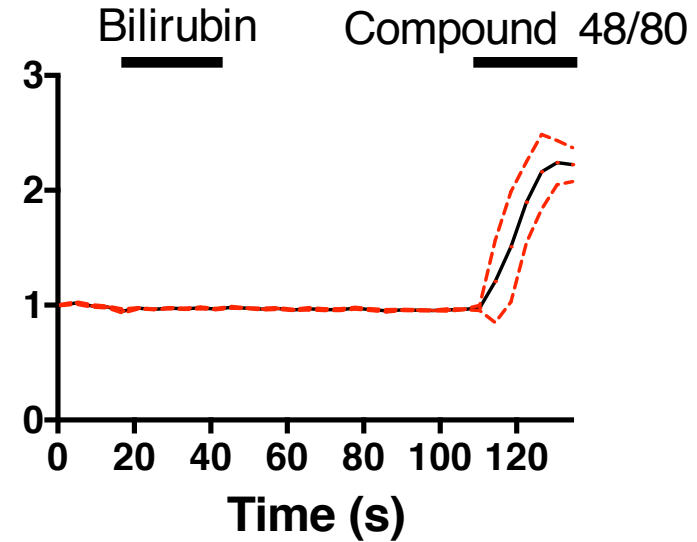

Supplement: supp [file elife-44116-supp-v1.zip]

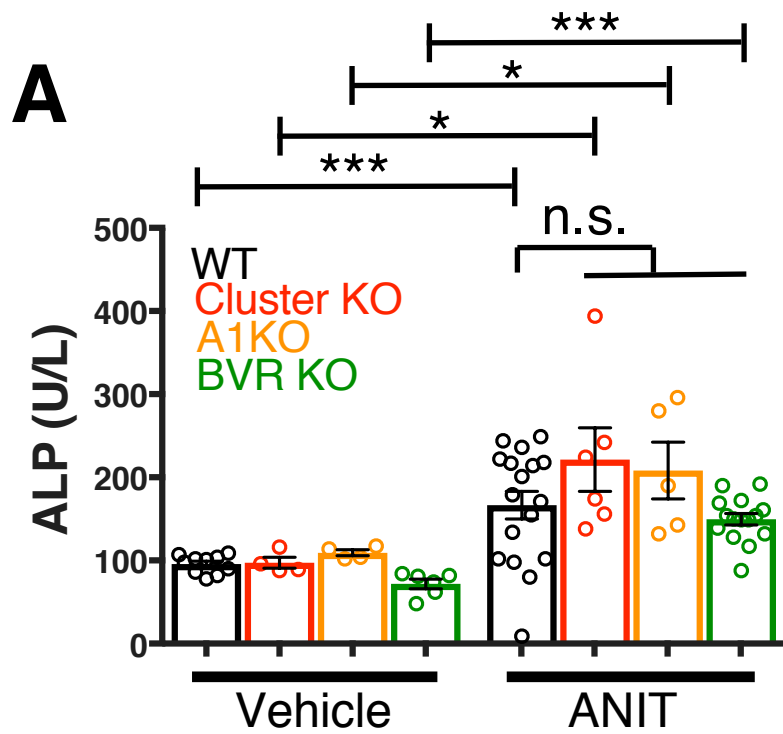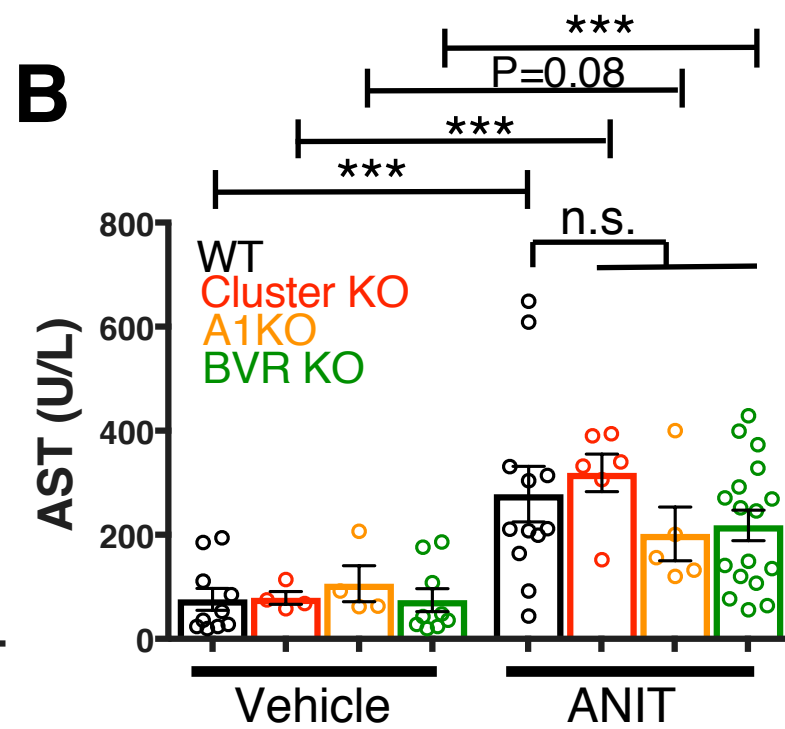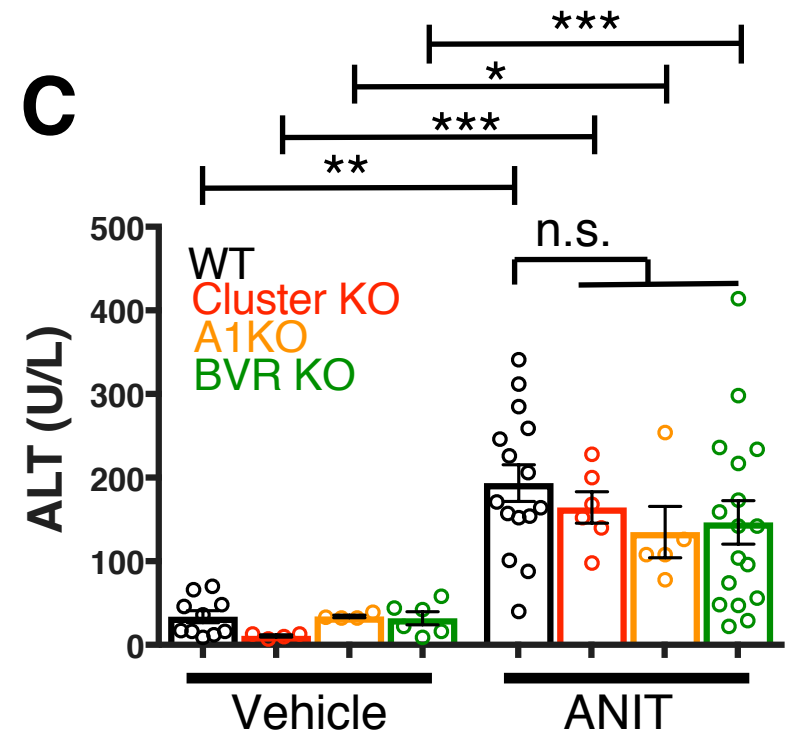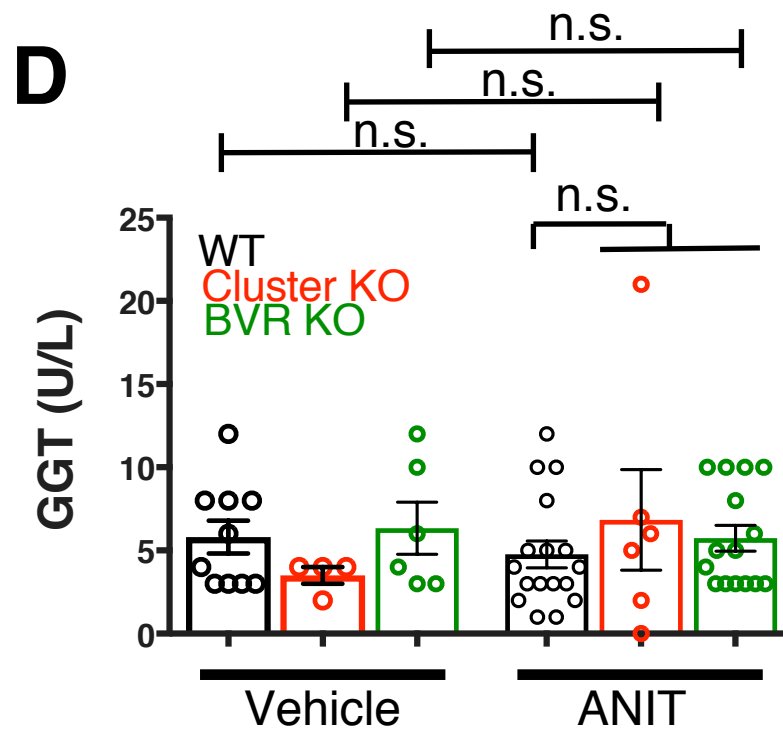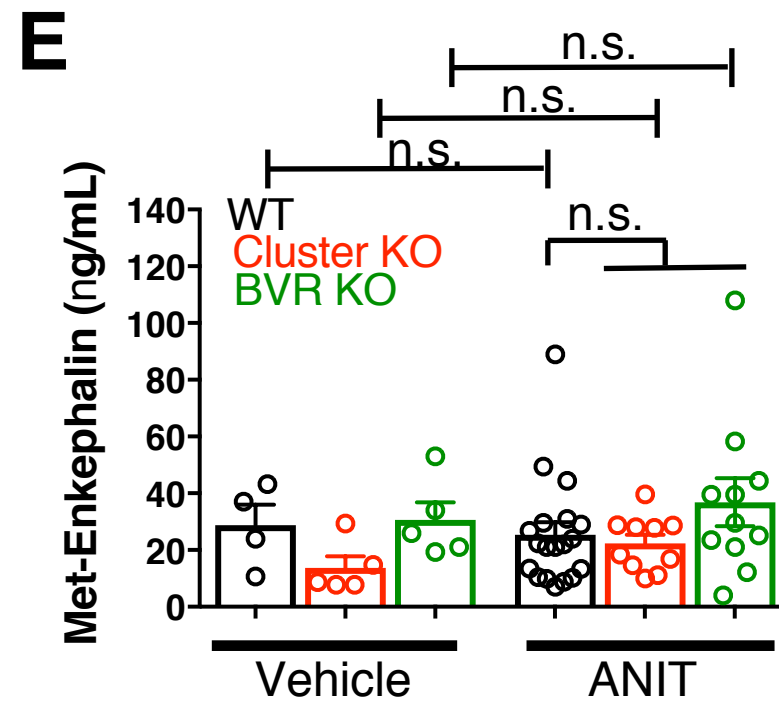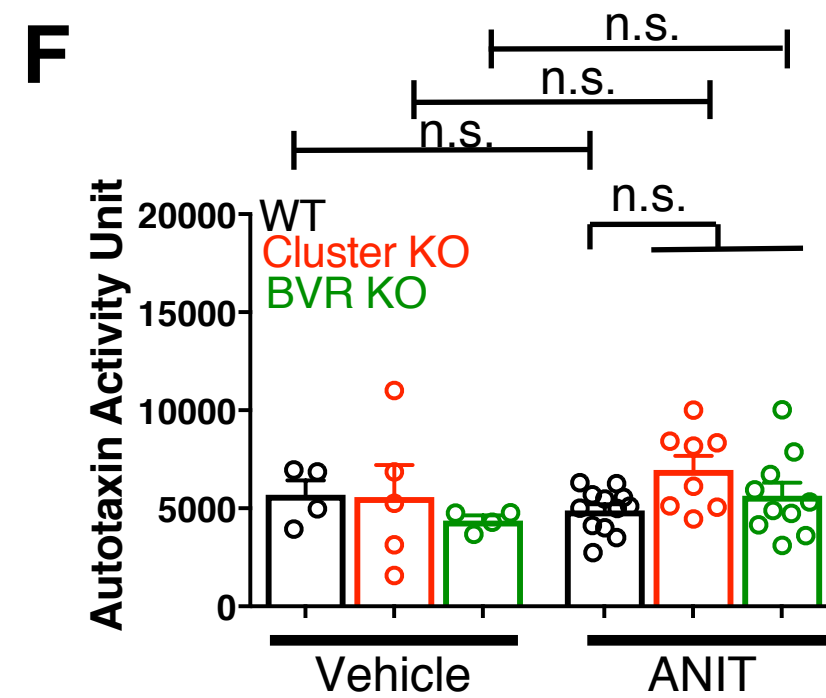

Supplement: supp [file elife-44116-supp-v1.zip]
